1 **Systemic signalling through *TCTPI* controls lateral root formation in Arabidopsis**

2

3 **Rémi Branco<sup>a</sup> and Josette Masle<sup>a,\*</sup>**

4

5

6 **Authors' Affiliation:**

7 <sup>a</sup> The Australian National University, College of Science, Research School of Biology,  
8 Canberra ACT 0200, Australia

9

10 **\* Corresponding author:** [Josette.masle@anu.edu.au](mailto:Josette.masle@anu.edu.au)

11

12 **Abstract**

13

14 As in animals, the plant body plan and primary organs are established during embryogenesis.  
15 However, plants have the ability to generate new organs and functional units throughout their  
16 whole life. These are produced through the specification, initiation and differentiation of  
17 secondary meristems, governed by the intrinsic genetic program and cues from the  
18 environment. They give plants an extraordinary developmental plasticity to modulate their size  
19 and architecture according to environmental constraints and opportunities. How this plasticity  
20 is regulated at the whole organism level is still largely elusive. In particular the mechanisms  
21 regulating the iterative formation of lateral roots along the primary root remain little known. A  
22 pivotal role of auxin is well established and recently the role of local mechanical signals and  
23 oscillations in transcriptional activity has emerged. Here we provide evidence for a role of  
24 Translationally Controlled Tumor Protein (TCTP), a vital ubiquitous protein in eukaryotes. We  
25 show that Arabidopsis AtTCTP1 controls root system architecture through a dual function: as  
26 a general constitutive growth promoter locally, and as a systemic signalling agent via mobility  
27 from the shoot. Our data indicate that this signalling function is specifically targeted to the  
28 pericycle and modulates the frequency of lateral root initiation and emergence sites along the  
29 primary root, and the compromise between branching and elongating, independent of shoot  
30 size. Plant TCTP genes show high similarity among species. TCTP messengers and proteins  
31 have been detected in the vasculature of diverse species. This suggests that the mobility and  
32 extracellular signalling function of *AtTCTP1* to control root organogenesis might be widely  
33 conserved within the plant kingdom, and highly relevant to a better understanding of post-  
34 embryonic formation of lateral organs in plants, and the elusive coordination of shoot and root  
35 morphogenesis.

36

37

## 38 **Main**

### 39 **Introduction**

40 Plant development is highly plastic. This is essential to survival and adaptation to a wide range  
41 of environments from which, being sessile, plants cannot escape. That plasticity manifests itself  
42 as an extraordinary capacity of a plant to modify the number, size, shape, patterning and spatial  
43 deployment of its organs, above and below ground, to efficiently adapt to environmental  
44 constraints.

45 As is typical of dicotyledonous species, the Arabidopsis root system arises from a primary root,  
46 initiated in the embryo, and *de novo* organogenesis of secondary and higher order lateral roots,  
47 post-embryonically [1, 2]. Lateral roots constitute the major part of the root system, and are  
48 major determinants of its ability to take-up water and nutrients and to further expand into new  
49 soil pockets. Despite their high agronomic and ecological relevance, the molecular mechanisms  
50 that determine the placement of LRs, in space and time, and their number are still little known.  
51 LR roots originate from inner root pericycle founder cells, through a pre-patterning (priming)  
52 activation and cell fate redefinition process that gives them competence to divide and  
53 differentiate in an orderly fashion to generate a highly organised root primordium [1, 3–5]. The  
54 establishment of LR initiation sites and subsequent actual initiation process are not well-  
55 understood. They are thought to involve an oscillating transcriptional network in interaction  
56 with auxin and other as yet unidentified mobile signals and, consistently to critically depend  
57 on intercellular connectivity [4–6].

58 There is intense trafficking of a vast array of molecules between shoot and roots – photo  
59 assimilates and a range of growth enabling metabolites, numerous hormones, and also a vast  
60 number of proteins and RNAs [7–11]. Besides specialised microRNAs (miRNAs) and small  
61 interference RNAs (siRNAs), translocated RNAs include a huge cohort of protein encoding  
62 mRNAs of various kinds. It is now well-recognised that hundreds to thousands mRNAs transit  
63 in the phloem and have long distance mobility between aerial organs and roots [11–15]. Long  
64 distance movement of proteins has also been demonstrated, many of which can be unloaded in  
65 the root tip [16, 17]. An emerging consensus is that this movement does not simply reflect  
66 passive diffusion and mass flow, but in part an actively controlled movement, likely serving  
67 the delivery of systemic signalling agents [17–22]. There are a few established cases of genes  
68 regulating plant development through mobility of their mRNA and /or encoded protein, such  
69 as FT in the regulation of flowering time [23, 24], GIBBERELIC ACID-INSENSITIVE

70 (GAI) or Mouse eras (me) in the regulation of leaf development [25, 26], *StBEL5* transcription  
71 factor in the control of tuber formation [27], or shoot-derived *Auxin/Indole-3-Acetic Acid*  
72 *IAA18* and *IAA28* in the regulation of lateral root formation [28]. However, nothing is known  
73 of the physiological significance of the vast majority of mobile mRNAs or proteins transiting  
74 through the phloem and roles in receiving cells, nor of the mechanisms controlling their  
75 excretion, transport and delivery.

76 Among the large number of mRNAs with demonstrated long distance mobility between above-  
77 and below-ground organs are transcripts encoding Transcriptionally Controlled Tumour  
78 Proteins (TCTP). These include Arabidopsis *AtTCTP1* [11, 12] and *AtTCTP2* [29], a *Vitis*  
79 *vinifera* TCTP (*GSVIVG01017723001* [13]), or *Csa3M154390*, a *Cucumis* TCTP [30]. TCTP  
80 is a highly conserved ubiquitous protein found in almost all eukaryotes. Its molecular function  
81 is still a matter of debate, but clearly relates to the regulation of GTPase activity [31, 32]. Fitting  
82 with this, TCTP is involved in a number of fundamental biological processes. It is known as  
83 an essential mitotic factor and a promoter of cellular growth interacting with the protein  
84 synthesis machinery, and also as a cytoprotective and anti-apoptotic protein (reviewed by [33,  
85 34]). Although best characterised in animals given their high relevance to malignancy and  
86 cancer progression, these core functions appear largely conserved in other eukaryotes,  
87 including plants, and make TCTPs essential proteins to embryogenesis and early development,  
88 organ patterning, regulation of organ size and cellular homeostasis [34]. In Arabidopsis, knock-  
89 out mutations of either *AtTCTP1* or its homologue, *AtTCTP2* are lethal [35, 36], as is the case  
90 of TCTP loss of function in mice [37] or drosophila [31]. Reduced *AtTCTP1* expression  
91 through RNA interference causes general cell proliferation and growth inhibition, in both  
92 vegetative and reproductive organs [35, 36] and plant TCTPs have been linked to resistance to  
93 various abiotic stresses, including salinity, drought, flooding, sub-optimal temperatures [38–  
94 43], and also to biotic stresses [44–46].

95 In addition to its core functions at the cellular level, mammalian TCTP has long been known  
96 to act as an extracellular protein in the immune system and was in fact first characterised as a  
97 histamine-releasing factor (HRF) [47]. Human TCTP has since been shown to modulate the  
98 release of cytokines and other signalling molecules [48] and have a broad role in immunity (  
99 reviewed in [49]). Whether plant TCTPs also assume non-cell autonomous functions is  
100 unknown. The demonstrated long distance translocation of TCTP transcripts and proteins  
101 between scion and root-stock in various species would support that possibility, but in itself

102 does not prove it. Another most interesting indication in that direction is the earlier finding by  
103 Aoki and colleagues [50] that pumpkin TCTP (CmaCh11G012000) moved rootward in a  
104 destination-, selectively controlled manner when introduced in rice sieve tubes, and  
105 furthermore in complex with RNA binding proteins and the conserved eukaryotic translation  
106 initiation factor eIF5A. Moreover, this association was found to be necessary to the selective  
107 movement of the protein complex.

108 Together these observations raise the prospect that plant TCTPs might have physiologically  
109 important systemic signalling functions, through mobility. This is what we sought to examine,  
110 focusing on Arabidopsis *AtTCTP1* [35]. We asked whether long-distance movement of  
111 *AtTCTP1* gene products occurs under physiological conditions and plays a role in shaping root  
112 architecture.

113

## 114 **Results**

### 115 ***AtTCTP1* mRNA moves through shoot-root graft junction, in both directions**

116 To investigate long distance mobility of endogenous *AtTCTP1* mRNA and encoded protein in  
117 a physiologically relevant context, and be able to differentiate between locally expressed  
118 *AtTCTP1* and *AtTCTP1* originating from distant sources, we performed reciprocal grafts  
119 between WT (Col-0) and a TCTP1-GFP line expressing a *AtTCTP1*-GFP fusion protein under  
120 the control of *AtTCTP1* native promoter (*pAtTCTP1::gAtTCTP1-GFP* [35], Fig. 1A). To avoid  
121 potential confounding effects from the uncontrolled formation of adventitious roots post-  
122 grafting, we developed a modified micro-grafting technique where none is formed (see  
123 Methods). Fourteen days after grafting (14 DAG), the scions had developed 5 to 6 leaves of  
124 normal size (Fig. 1B), indicating that the scion-root stock junction was fully functional.  
125 Microscopic observation confirmed a clean junction, with continuous vasculature and absence  
126 of adventitious root primordia (Fig. 1C-F).

127 *TCTP1-GFP* transcripts were detected in both the scion of WT / TCTP1-GFP grafts and the  
128 rootstock of TCTP1-GFP / WT reciprocal grafts. This was observed in young seedlings grown  
129 *in vitro* (14 DAG, Fig. 1G) and also at a much later stage (early flowering) in soil-grown grafts  
130 (80 DAG, Fig. 1H). Mobile *TCTP1-GFP* transcripts were more abundant in the latter, both in  
131 absolute terms and relative to endogenous *AtTCTP1* transcripts in the same tissue (0.4% and  
132 2-3% in scion and rootstock, respectively in soil-grown plants compared to 0.001% and

133 0.00009% in seedlings on agar media). These data demonstrate sustained bi-directional  
134 mobility of *AtTCTP1* mRNA, of variable magnitude.

135

136 **AtTCTP1 protein of scion origin is detected in WT rootstock, with preferential**  
137 **accumulation in phloem-pole pericycle cells at sites of lateral root formation**

138 We next examined the presence of the encoded TCTP1-GFP protein in these grafts by confocal  
139 laser microscopy. A weak TCTP1-GFP fluorescence signal was consistently detected in the  
140 primary root of *pAtTCTP1::gTCTP1-GFP* / WT heterografts (Fig. 2A-E), whether in the agar-  
141 grown seedlings (Fig. 2 A-C, 8 to 13 DAG) or the older soil-grown plants (Fig. 2E, 80 DAG).  
142 Imaging the scion with the same microscope settings completely saturated the confocal  
143 photomultiplier (images therefore not shown). GFP fluorescence localised along the vascular  
144 strands, with acropetally increasing intensity towards the root tip, down to about 250  $\mu$ m from  
145 the quiescent centre ( $251 \pm 11.8 \mu$ m at 13 DAG,  $n = 5$ ), within the transition zone from the root  
146 elongation zone to the root meristem, where the GFP signal completely disappeared (Fig. 2A,  
147 B, E; Supplementary Fig. 1), coinciding with the end of the protophloem. Closer inspection at  
148 higher resolution along the root elongation and differentiation zones showed patchy GFP signal  
149 intensity reflecting preferential protein accumulation in phloem-pole pericycle cells at the sites  
150 of lateral root initiation (Fig. 2C, F, G). WT roots grafted to scions expressing a *p35S::YFP-*  
151 *cTCTP1* construct providing a much stronger fluorescence signal, also clearly showed  
152 pericycle-specific localisation of YFP fluorescence (Fig. 2D). TCTP1-GFP fluorescence was  
153 also detected in LR primordia (LRP), but was much weaker, sometimes barely detectable until  
154 the root had emerged and started to fast elongate (Fig. 2H). The pattern of GFP fluorescence  
155 in control roots grafted on a scion expressing GFP alone under the same promoter was very  
156 different, with a very high ubiquitous signal in the whole stele and throughout the root meristem  
157 (Supplementary Fig. 2), as previously reported [51, 52]. Taken together, these results suggest  
158 that rootward *TCTP1* mobility is actively controlled and may have a specific signalling function  
159 in root development, targeted to cells involved in the spatial patterning of lateral root primordia  
160 along the primary root.

161 To examine this in more detail, we monitored the appearance of TCTP1-GFP fluorescence in  
162 the rootstock of TCTP1-GFP / WT grafts over a ten day period following grafting. The earliest  
163 evidence of GFP fluorescence was on 7 DAG (23 out of 28 roots; Supplementary Fig. 3),  
164 consistent with reports of fully functional graft junction in Arabidopsis [53]. Strikingly, the

165 preferential TCTP1-GFP accumulation in the primary root elongation zone observed in older  
166 roots (Fig. 2), was already obvious (Fig. 3A). Moreover, when imaging the entire root from  
167 base to tip, TCTP1-GFP fluorescence was first encountered in two patches localised in  
168 pericycle cells at the base of the two youngest LR primordia, both at initiation stages I-II [3]  
169 (Fig. 3H-I). This result further supports the notion of a destination-selective signalling function  
170 of mobile *TCTP1* gene products originating from the shoot, in the initiation of lateral roots.  
171 Given the bi-directional mobility of *TCTP1* mRNA (Fig. 1G, H) we examined the presence of  
172 GFP-fluorescence in WT scions grafted onto *pAtTCTP1::gAtTCTP1-GFP* roots. GFP  
173 fluorescence was undetectable, whether in young or mature leaves, or in the shoot apical  
174 meristem (Fig. 2I, J).

175

### 176 **Constitutive expression of *AtTCTP1* in scion promotes scion growth which in turn** 177 **stimulates root growth**

178 In our earlier characterisation of *AtTCTP1* we showed that *AtTCTP1* gene products, mRNA  
179 and protein, are constitutively highly expressed in the primary root meristem and LR primordia,  
180 and that *AtTCTP1* silencing inhibits root elongation and lateral root branching [35]. The above  
181 results in the present study suggested a role of *AtTCTP1* in root development through mobility  
182 too. To investigate that, for lack of roots devoid of constitutive *AtTCTP1* expression given the  
183 embryo lethality of total *AtTCTP1* knock-out and the dwarfism of *tctp1* seedlings rescued  
184 through embryo culture [35, 36], we severed TCTP1-RNAi roots from 5 days old seedlings  
185 expressing a constitutive *AtTCTP1* silencing construct [35], (thereafter referred to as TCTP1-  
186 RNAi or RNAi) and grafted them to either a WT scion of the same age, or back to the severed  
187 homologous TCTP1-RNAi scion. Root development in these grafts was then monitored over  
188 the next 3-4 weeks. We reasoned that the 100-fold higher *AtTCTP1* constitutive expression in  
189 WT scions than TCTP1-RNAi scions [35] should translate into a significantly increased  
190 amount of scion-to-root mobile *AtTCTP1* messenger and protein in WT / RNAi compared to  
191 RNAi / RNAi grafts, and thus enable us to determine whether the distinctive short root and  
192 reduced branching of the rootstock is root-autonomous or involves signalling by *AtTCTP1* from  
193 the scion. WT / RNAi reciprocal heterografts were grown alongside each other and control WT  
194 / WT and RNAi / RNAi homografts, in replicated plates. WT primary roots grew faster than  
195 TCTP1-RNAi roots irrespective of scion genotype (Fig. 4A, B). Both WT and TCTP1-RNAi  
196 roots elongated faster when grafted onto a WT rather than TCTP1-RNAi scion (26% and 21%,

197 increase in maximum relative elongation rate 13 DAG, respectively, Fig. 4C). It is known,  
198 however, that siRNA can move long distances through the plant [54–57]. To test whether this  
199 explained the root growth inhibition associated with TCTP1-RNAi scions, we measured  
200 *AtTCTP1* transcript abundance in homo- and hetero-grafts scions and rootstocks by  
201 quantitative RT-PCR. *AtTCTP1* mRNA levels in WT roots showed a nearly 6-fold reduction  
202 in RNAi / WT compared to WT / WT seedlings ( $P = 0.005$ , Fig. 4D). This is much higher than  
203 could be expected from simply a reduction of mobile rootward *AtTCTP1* mRNAs (see Fig. 1G,  
204 H) and hence suggested some down-regulation of *AtTCTP1* expression in these roots by mobile  
205 siRNA from the RNAi scion. By contrast, *AtTCTP1* transcript abundance in RNAi roots was  
206 similar regardless of scion genotype ( $0.68 \pm 0.118$  and  $0.77 \pm 0.013$  relative transcript  
207 abundance in RNAi / RNAi and WT / RNAi grafts, respectively,  $P = 0.55$ ; Fig. 4D), ruling out  
208 that simple explanation for their slower elongation rate. To verify that mobile *AtTCTP1*  
209 transcripts from the scion were not silenced by siRNA upon delivery to the root, we grafted  
210 TCTP1-GFP scions on TCTP1-RNAi roots and quantified transgenic *TCTP1-GFP* mRNAs in  
211 the root stock (Fig. 4E). *TCTP1-GFP* messengers were present in roots of TCTP1-GFP / RNAi  
212 grafts, in low but significant abundance representing a similar or higher fraction of the amount  
213 of TCTP1 mRNAs transcribed in the scion of TCTP1-GFP / WT grafts in our earlier  
214 experiments (ca 0.006 %). Moreover, GFP fluorescence from the encoded TCTP1-GFP protein  
215 was consistently detected in the root, with the same spatial expression pattern (Fig 4F compared  
216 to Fig. 2B). Altogether these data indicate the presence of a significantly higher amount of  
217 intact *TCTP1* messengers of scion origin in TCTP1-RNAi roots grafted to a WT scion instead  
218 of homologous TCTP1-RNAi scion.

219

220 Despite being all trimmed to a similar size at the time of grafting (see Methods), WT scions  
221 quickly became larger than TCTP1-RNAi scions (Supplementary Fig. 4), consistent with the  
222 high expression of *AtTCTP1* in the shoot apical meristem and its growth promoting effect in  
223 leaves [35]. This suggested that the faster elongation rates of TCTP1-RNAi roots in WT / RNAi  
224 than RNAi / RNAi grafts might then at least partly reflect an increased photo-assimilate supply  
225 from larger scions, rather than higher abundance of *AtTCTP1* mRNA translocated from the  
226 scion. To address this, we grafted TCTP1-RNAi roots onto WT scions or onto homologous  
227 TCTP1-RNAi scions of the same age as earlier. But at 7 DAG, when the graft junction was  
228 fully established and TCTP1-RNAi root lengths were still similar regardless of scion genotype  
229 ( $12.8 \pm 1.25$  mm and  $11.4 \pm 0.91$  mm in WT / RNAi and RNAi / RNAi grafts, respectively;



230 Student's T-test,  $P = 0.13$ ,  $n \geq 6$ , Fig. 4B), we normalised WT scion sizes to RNAi scion sizes  
231 through amputation of one cotyledon (scions thereafter denoted WT<sub>AMP</sub>). To minimise  
232 potential confounding wounding effects in subsequent phenotypic analyses, the petiole of one  
233 cotyledon was manually pinched in control grafts. Two weeks later (22 DAG), scion sizes were  
234 still similar in the two sets of grafts (WT<sub>AMP</sub> / RNAi and RNAi / RNAi, Fig. 4G, Student's T-  
235 test,  $P = 0.85$ ,  $n \geq 16$ ), and about half the size of non-amputated WT scions in WT / RNAi  
236 grafts. Remarkably, associated TCTP1-RNAi rootstock showed similar primary root lengths  
237 (Fig. 4H), significantly shorter than roots of WT / RNAi grafts. This was confirmed in  
238 independent experiments (Supplementary Fig. 5). When individually plotted against scion  
239 sizes, root lengths described a unique relationship for the three sets of grafts, and data points  
240 for TCTP1-RNAi roots associated to WT<sub>AMP</sub> or TCTP1-RNAi scions overlapped (Fig. 4H).  
241 Consistently, relative root elongation rates over the monitoring period (7 to 22 DAG) were  
242 similar ( $4.17 \pm 0.15 \text{ h}^{-1}$  and  $4.07 \pm 0.14 \text{ h}^{-1}$  in WT<sub>AMP</sub> / RNAi and RNAi / RNAi grafts,  
243 respectively, Student's T-test,  $P = 0.09$ ,  $n \geq 16$ ). Moreover, the cell length profiles in the root  
244 elongation zone also showed complete overlap, and final cell lengths were similar (Fig 4J).  
245 These results indicate that, at same scion size, differences in constitutive *AtTCTP1* expression  
246 levels in the scion and rootward mobile *AtTCTP1* gene products have little impact on primary  
247 root elongation.

248

#### 249 **Graft-mobile *AtTCTP1* transcripts and encoded protein promote lateral root initiation** 250 **and emergence**

251 As scion-derived TCTP1-GFP showed preferential accumulation at sites of lateral root  
252 initiation (Fig. 2), we next closely examined root branching patterns. The number of lateral  
253 roots varied between plants. That variation was closely correlated to variation in scion size  
254 (Fig. 5A). Data points for WT<sub>AMP</sub> / RNAi and WT / RNAi grafts fell on the same line (slopes  
255  $0.38 \pm 0.02$  and  $0.36 \pm 0.04$ , respectively), indicating that partial amputation of WT<sub>AMP</sub> scions  
256 had *per se* no unwanted confounding effects on root development. Remarkably, lateral root  
257 numbers in RNAi / RNAi grafts fell significantly below those seen in WT<sub>AMP</sub> / RNAi  
258 heterografts. The density of lateral root formation sites along the primary root was decreased  
259 by 41% on average (Fig. 5B), while being as high in roots grafted to WT<sub>AMP</sub> than the much  
260 larger WT scion (Student's T-test,  $P = 0.36$ ,  $n \geq 15$ ; Fig. 5B).

261

262 We next used Differential Interference Contrast (DIC) microscopy to examine the entire length  
263 of the primary root in WT<sub>AMP</sub>/RNAi and RNAi/RNAi grafts, for non-emerged LR primordia  
264 (denoted *LRP* hereafter; stages I-VII [3]) in addition to emerged LRs (denoted *LR*), also  
265 separately scoring those found on the primary root segment formed pre- or post- grafting and  
266 scion-size normalisation (Fig. 5C). The former were confined to the basal 8-9 mm of the  
267 primary root, and in total amounted to 2.9 average in the two sets of grafts (Student's T-test,  $P$   
268 = 0.89,  $n = 14$ ). The density of both *LRP* and *LR* lateral roots on the younger, proximal primary  
269 root segment formed post-scion size normalisation, was significantly greater in WT<sub>AMP</sub>/RNAi  
270 than RNAi/RNAi grafts ( $P < 0.05$ ,  $n = 14$ ; Fig. 5C, D). This was already clear 12 DAG and  
271 even more obvious 6 days later. Consistent with the increased *LRP* density, the expression of  
272 *CycB1;1*, a marker of the early divisions of pericycle cells that initiate lateral root formation  
273 [58] was also increased in roots from WT<sub>AMP</sub>/RNAi grafts compared to those of RNAi/RNAi  
274 grafts ( $P < 0.004$ , Fig. 5E). In the course of these experiments, we noticed that the youngest,  
275 most acropetal *LRP* seemed located closer to the root tip. Systematic measurements of its  
276 coordinate along the primary root showed that the zone of lateral root formation indeed  
277 extended significantly closer to the root meristem in WT<sub>AMP</sub>/RNAi than RNAi/RNAi grafts  
278 ( $P = 4.10^{-4}$ ,  $n = 10$ , Fig. 5F). Root patterning was completely normal (Supplementary Fig. 6).  
279 Taken together, these data indicate a stimulation of lateral root initiation and emergence in  
280 WT<sub>AMP</sub>/RNAi grafts, at same scion size and primary root length and anatomy, thus likely  
281 related to enhanced delivery of mobile *AtTCTP1* gene product(s) from WT scions compared to  
282 RNAi scions. The identical cell length profiles along the whole transition, elongation, and  
283 differentiation zones of the two sets of roots imply an increased frequency of LR priming events  
284 along the primary root pericycle.

285

286 While initiated and emerging in greater number in WT<sub>AMP</sub>/RNAi than RNAi/RNAi grafts,  
287 lateral roots were on average shorter ( $P = 4.10^{-4}$ ,  $n \geq 16$ ; Fig. 5G). Strikingly, the overall result  
288 was that their cumulated length over the whole primary root was unaffected, similar to that  
289 measured for RNAi/RNAi grafts ( $P = 0.32$ ,  $n \geq 15$ , Fig. 5H; Supplementary Fig. 7). Plant to  
290 plant variation in cumulated LR root length was correlated to individual variation in scion size  
291 (Fig. 5H) as found for primary root length, and data points fell on the same relationship for the  
292 two sets of grafts (Fig. 5H). Taken as a whole, these results indicate a signalling role of  
293 *AtTCTP1* rootward mobility in root development, specifically targeted at the regulation of early  
294 events of LR formation and of *LRP* emergence from covering layers.

295

## 296 **Discussion**

297 TCTP function and physiological roles in plants are only beginning to be unravelled. The  
298 possibility of a dual role, as a protein acting not only cell-autonomously, but also extra-  
299 cellularly as found in mammals and other eukaryotes remains unknown. This study indicates a  
300 targeted, selective function of scion-encoded mobile endogenous Arabidopsis *AtTCTP1*  
301 mRNA and translated protein in shaping the deployment of the root system.

302 *AtTCTP1* mRNA movement was reported to occur in a strictly rootward direction [11]. Here,  
303 we consistently detected a bi-directional movement, whether in plate assays with young  
304 seedlings raised under similar conditions as in the earlier study, or after graft transfer to soil.  
305 This discrepancy may be related to the different reporter constructs used: full genomic *TCTP1*  
306 here, including 5'UTR and native upstream promoter region; *TCTP1* cDNA fused to the  
307 constitutive cauliflower mosaic virus promoter in the previous study. The 5' UTR of *AtTCTP1*  
308 contains a conserved 5'TOP (terminal oligopyrimidine tract) motif, and two AUUUA motifs  
309 are present in the 3'UTR. TOP mRNAs are highly sensitive to translational control and  
310 AUUUA motifs are also important in mRNA stability and translation [59]. In animals these  
311 motifs are thought to be important in the control of TCTP translation [33] and in Arabidopsis  
312 itself have been suggested to influence the expression pattern of *AtTCTP1* [36]. It may be that  
313 the 5' and 3'UTRs also play a role in the mobility and/or transport of *AtTCTP1* transcripts, as  
314 shown for *StBEL5* mRNA movement from leaf and petioles to stolon tips in the regulation of  
315 tuber formation in *Solanum tuberosum* [27]. Supporting our results, an also bi-directional  
316 endogenous movement of the native *Vitis vinifera TCTP1* mRNA homologous to *AtTCTP1* has  
317 been documented in heterografts of two polymorphic *Vitis* genotypes, through genome-wide  
318 sequencing of scions and rootstock mRNAs [13]. The consistency of our observations in  
319 seedlings grown in vitro and older soil-grown plants provides evidence that long distance  
320 movement of endogenous *AtTCTP1* mRNA between shoot and root is not a transient  
321 occurrence, nor an experimental artefact, but a sustained phenomenon, which takes place under  
322 physiological conditions.

323 If that phenomenon has a physiological function one would expect it to be actively controlled,  
324 in a growth conditions or development stage dependent manner. Fitting with this, while always  
325 representing a small fraction of the transcripts produced in the source organ as seems the norm  
326 [12, 13, 22], the proportion of *AtTCTP1* mRNAs transmitted across root-shoot graft junctions

327 showed significant variation from plant to plant and between *in vitro* and soil experiments  
328 (Fig. 1). Consistently, for rootward movement, the fluorescence signal associated with TCTP1-  
329 GFP protein derived from mobile scion *TCTP1* mRNAs was also of variable intensity,  
330 especially in the population of elongating lateral roots of soil-grown plants, being even  
331 undetectable in some. No conclusion is possible about TCTP1-GFP protein in the scion of  
332 reciprocal WT / TCTP1-GFP grafts. It was undetectable, indicating either absence of  
333 translation at least under our experimental conditions, or very low abundance but nevertheless  
334 functionality as shown for some other regulatory proteins of root development such as  
335 BREVIS RADIX for example [60].

336 Another expectation of mobile gene products serving a physiological function, is that they give  
337 rise to distinct, quantifiable phenotypes. To examine this we focused on *AtTCTP1* rootward  
338 mobility. Our results provide convergent evidence towards a systemic signalling role targeted  
339 at cells involved in the initiation and emergence of lateral roots. First, the scion-derived TCTP-  
340 GFP protein detected in the WT primary root of TCTP1-GFP/WT grafts consistently showed  
341 a distinctive localisation pattern, being a) absent from the root meristem, b) confined to the  
342 vasculature, with recurrent peaks of higher intensity, systematically coinciding with sites of  
343 lateral root primordia initiation in the pericycle; c) highly abundant in the root elongation and  
344 transition zones upstream to the root meristem proper, which encompass a region of  
345 “oscillatory gene expression” where priming of LR initiation takes place [4, 5]. This pattern is  
346 in stark contrast with the ubiquitous expression, in all root layers and also the root meristem,  
347 of the constitutive root *AtTCTP1* protein, translated from locally transcribed *AtTCTP1*  
348 transcripts [35]. It is also distinct from the pattern observed for mobile GFP or YFP alone, and  
349 passive mass flow transport through the phloem and leakage from companion cells to pericycle  
350 cells. These results indicate the presence of active targeting, capture or unloading mechanisms  
351 in the root of *AtTCTP1* gene products encoded in the shoot. Second, TCTP1-RNAi roots of  
352 similar structure, anatomy, size and elongation rate but associated with WT<sub>AMP</sub> scions rather  
353 than TCTP1-RNAi scions of similar size, exhibited an extended zone of lateral root formation  
354 starting closer to the root tip. Third, the densities of root branching sites (emerged LR) and of  
355 lateral root initiation sites (non-emerged LRP at more acropetal positions) along that zone were  
356 both increased. The specificity of these changes and shift towards more numerous and on  
357 average shorter LR, in an extended zone, while the overall length of root over the whole root  
358 system was unaffected, contrasts with the general promotion of both primary and lateral root  
359 elongation associated with increased local constitutive *AtTCTP1* expression [35], or with

360 increased scion size (Fig.4 and 5), or with independently induced increases of photo assimilate  
361 supply via stimulation of carbon metabolism [61, 62]. Differential sucrose uptake by TCTP1-  
362 RNAi and WT<sub>AMP</sub> scions directly from the media – which is known to influence lateral root  
363 emergence [63] - can also be ruled out as an explanatory factor for the effects of scion genotype  
364 observed here on root system architecture, as our grafts were raised in the absence of exogenous  
365 sucrose supply.

366

367 The phloem is the long distance delivery path to roots of auxin synthesised in leaves and  
368 cotyledons. Auxin has a pivotal role in orchestrating root architecture [64–66], being required  
369 for the activation of LR potential initiation sites in the pericycle, the subsequent process of  
370 primordium initiation and formation, and the breaking of overlying tissues for its emergence  
371 out of the primary root epidermis [1, 4, 67–72]. However, TCTP1-RNAi seedlings of the same  
372 age as used in this study and raised under similar growth conditions in earlier experiments,  
373 were found to in fact have higher endogenous auxin concentrations than WT seedlings in both  
374 shoots and roots [35], and, consistently, higher expression of the auxin inducible transcriptional  
375 regulator IAA5. In addition, application of the auxin polar transport inhibitor NPA in the  
376 present study had no detectable influence on the abundance or localisation of the AtTCTP1  
377 protein translated from mobile *AtTCTP1* transcripts (Supplementary Fig. 8). It is therefore  
378 unlikely that stimulation of lateral root initiation and emergence in WT<sub>AMP</sub>/ RNAi compared  
379 to RNAi / RNAi grafts could result from a higher auxin production in the scion and increased  
380 auxin delivery to the root.

381

382 Taken as a whole, these observations provide a compelling argument for ascribing the scion  
383 genotype-dependent modulation of root architecture observed in our grafts to differential  
384 transmission rate of mobile scion *AtTCTP1* gene products to the root, associated with the large  
385 (two orders of magnitude) difference in constitutive *AtTCTP1* transcripts abundance between  
386 WT<sub>AMP</sub> and TCTP1-RNAi scions (Fig. 4D [35]). We propose a model (Fig. 6) where local  
387 constitutive *AtTCTP1* controls core cellular processes, vital to cellular function, growth and  
388 proliferation, in both roots and shoot, and determines the overall length of root that can be  
389 formed in interaction with photo assimilate supply; while mobile *AtTCTP1* messengers -and  
390 perhaps proteins- transmitted from the shoot act as destination-selective systemic signalling  
391 molecules to dynamically modulate the spatio-temporal pattern of lateral root initiation and

392 emergence, and possibly too the initial priming of pericycle LRP founder cells, i.e. the  
393 plasticity of root system architecture.

394 Whether *AtTCTP1* mRNAs only get transmitted from shoot to roots, and fulfil their function  
395 through destination-selective delivery and decoding in the root, or whether some might get  
396 translated in the scion, followed by selective loading of the protein into the phloem, and  
397 selective unloading in specific destination cells in the root, remains to be determined. The two  
398 scenarios are not exclusive. Disentangling them will be challenging given the high and  
399 ubiquitous constitutive expression of *AtTCTP1* in source and destination tissues of mobile  
400 *AtTCTP1* mRNAs, and also the limitations of transgenic approaches with non-endogenous  
401 gene products when it comes to characterisation of movement and function. Suggesting the  
402 possibility of *AtTCTP1* protein mobility too, an actively controlled rootward movement of the  
403 highly similar pumpkin *CmTCTP1* (*CmaCh11G012000*) in rice phloem sieve tubes has been  
404 reported[50]. Its functionality was not analysed, but most interestingly the mobile *CmTCTP1*  
405 (*CmaCh11G012000*) was found to be translocated as part of a protein complex including  
406 *CmPP16-1* and *CmPP16-2* phloem RNA binding proteins and also the initiation factor  
407 *CmeIF5A*, among other undetermined components - an association fitting with the assumed  
408 molecular function of plant TCTPs in protein synthesis, as established in animals [73, 74].  
409 Under either scenario – mobility of the messenger only, or of the protein also-, it will be  
410 intriguing to elucidate how destination cells recognise the mobile *AtTCTP1* gene products  
411 generated in distant cells from those they autonomously produce; and what their mechanisms  
412 of action are.

413

414 The plasticity of root system architecture is pivotal to plant adaptation to changes in  
415 environmental conditions, and strategic mining of spatially and temporally variable soil  
416 resources. *AtTCTP1* appears as a central controller of that plasticity. Combining a dual  
417 function - general constitutive growth promoter, and mobile signalling agent between shoot  
418 and roots - in a vital, highly expressed gene, furthermore encoding a protein highly sensitive to  
419 translational and post-translational modifications, appears as a clever strategy for a sensitive  
420 and dynamic tuning of root system architecture to optimise the compromise for roots between  
421 reaching deeper or branching more profusely according to growth. Interestingly, the much  
422 lowlier and more specifically expressed Arabidopsis *AtTCTP1* orthologue, *AtTCTP2*, was  
423 reported to encode a mRNA and protein with bi-directional long distance mobility when

424 overexpressed in *Nicotiana benthamiana* [29]. And movement across the graft junction  
425 appeared to correlate with the formation of aerial roots at the interface of the grafted stem  
426 segments [29]. This raises the possibility of a broad role of *TCTP* mobile mRNAs/proteins in  
427 *de novo* root organogenesis, whether lateral roots or shoot-born roots, with specificity between  
428 gene isoforms in cell types targeted for developmental reprogramming and formation of root  
429 primordia from a variety of tissues [2], as most appropriate.

430

431 Plant *TCTP* genes show high similarity among species. *TCTP* messengers and proteins have  
432 been detected in the vasculature of diverse species, including the monocot rice where the *TCTP*  
433 family is reduced to one member (Supplementary Table 1). This suggests that the mobility and  
434 extracellular signalling function of *AtTCTP1* to control root organogenesis might be widely  
435 conserved within the plant kingdom, and highly relevant to a better understanding of post-  
436 embryonic formation of lateral organs in plants, and the elusive coordination of shoot and root  
437 morphogenesis.

438

## 439 **Methods**

### 440 **Plant material and Growth conditions**

441 The transgenic pro*TCTP1*::g*TCTP1*-GFP::NOS (*TCTP1*-GFP) and the *TCTP1*-RNAi lines are  
442 as described in our previous work [35], and the 35S::YFP-cDNAT*TCTP1* as in [11]. All lines  
443 are in *Arabidopsis thaliana* Columbia (Col-0) background (wild type, WT). Seeds used within  
444 individual experiments are of the same age and were harvested from isolated plants grown  
445 together, under the same conditions.

446 The hypocotyl micro-grafting method was as described [75] with minor adaptations to improve  
447 success rate rate and reduce adventitious root emergence. Seeds were surface-sterilized for 5  
448 min with a solution of sodium hypochlorite 0.125% (v/v) and 90% (v/v) ethanol, rinsed 3 times  
449 in 100% ethanol and dried under a laminar flow hood, before being resuspended in sterile water  
450 and sown directly on the surface of a nitrocellulose membrane strip (Membrane Filter –  
451 Cellulose Nitrate 0.45 µm diameter, Whatman code NC45ST) laid on top of a nutrient agar gel  
452 (2,15 g L<sup>-1</sup> MS salts, 0.5% sucrose, 1% Agar type-M, pH 5.7) in petri plates. The plates were  
453 sealed with porous micropore tape (3M), stratified for two days at 4°C in the dark and incubated

454 under controlled conditions (12h photoperiod, 21 °C, 120  $\mu\text{mol quanta m}^{-2} \text{ s}$  light intensity), in  
455 a vertical position. Four to six days later, under sterile conditions, the two cotyledons were  
456 severed mid-way through their petiole. The seedlings were positioned with the hypocotyl  
457 perpendicular to the nitrocellulose strip, with the shoot (scion) overhanging on the agar. A  
458 sharp cut was then performed in the first top mm of the hypocotyl. The hypocotyl stump (scion)  
459 and root (root stock) were grafted onto the relevant rootstock and scion, respectively, as  
460 indicated, by simple contact through the clean cuts, maintained by dint of water surface-tension  
461 and ensuring the cotyledon petioles were slightly above the agar surface. This generated  
462 controlled reciprocal heterografts (WT scion / transgenic rootstock, and conversely) and  
463 homografts (scion and root stock of the same genotype, but severed from different seedlings as  
464 in heterografts). The plates were resealed and returned to the growth chamber. Five days later  
465 (5 DAG, 5 days after grafting), the seedlings were transferred to large square plates (12 x 12  
466 mm) filled with similar media but without sucrose. For the auxin experiment, 20  $\mu\text{M}$  NPA (N-  
467 1-Naphthylphthalamidic acid in DMSO) or appropriate volume of DMSO solvent was supplied  
468 to the media, and the thickness of agar gel underneath the scion was removed so that the scion  
469 never touched it. All scion-rootstock combinations compared within an experiment were raised  
470 alongside each other within each replicated plate.

471 For the plants grown on soil, on 5 DAG, grafted seedlings were transferred to pots filled with  
472 seed raising mix supplemented with Osmocote slow release fertiliser (5g.L<sup>-1</sup>), and then raised  
473 alongside seedlings in plates, under the same standard conditions (12h daylength, 21°C, 120-  
474 140  $\mu\text{E}$  measured at pot level).

## 475 **Microscopy**

476 For *in vivo* confocal microscopy root, scion, or part of, were mounted on slides in ½ MS liquid  
477 media (0% sucrose, pH 5.7, 21°C) and imaged using a TCS-SP8 microscope (Leica, Germany)  
478 equipped with a 10X/0.3 NA or 63X/1.2 NA water immersion objective. Autofluorescence  
479 spectra were acquired on the same samples for spectral unmixing. Autofluorescence was  
480 excited using a 488 nm Argon laser and acquired in  $\lambda$ -mode (from 495 nm to 600 nm, 5 nm  
481 acquisition window) with the pinhole opened at 2.8 Airy unit. The same parameters were used  
482 to acquire GFP or YFP fluorescence on the same samples fluorescence and was spectra were  
483 subsequently unmixed using LAS-X (Leica) software. For monitoring the temporal and spatial  
484 patterns of appearance of scion-derived TCTP1-GFP fluorescence in the root, the whole  
485 primary root was imaged from 2 DAG, when graft junctions were strong enough, in x,y-mode.



486 The fluorescence was acquired with a 10X/0.3 NA objective and a 510-525 nm acquisition  
487 window, with the same acquisition for all roots within an experiment, and each positive signal  
488 was confirmed by spectral unmixing.

489 For light microscopy, samples were mounted in water, and imaged in DIC (Differential  
490 Interferential Contrast) mode with a Leica DM5000B microscope fitted with a 40X/0.85 NA  
491 dry objective and a Leica DFC 310FX camera (Leica Instruments). Individual cell lengths were  
492 measured along epidermal files from the quiescent centre to the root differentiation zone, using  
493 a custom macro in Fiji (code available upon request). Mature cell length was estimated by the  
494 means of 10 consecutive cells in the root differentiation zone.

495

## 496 **Phenotyping**

497 For determination of the kinetics of root elongation, plates were scanned daily from seed  
498 germination using a flatbed scanner (Epson Perfection 2450 photo, Seiko Epson, Japan) at a  
499 resolution of 600 dpi, 8-bits per channel and saved in Jpeg. The raw images were automatically  
500 pre-processed (cropped and aligned with “Linear Stack alignment” plugin) with a custom “auto  
501 align” macro in Fiji, and root lengths ( $l$ ) were measured using RootTrace as described in [76]  
502 (code available upon request). At least 6 plants per condition with a complete trace were  
503 available for each of the compared genotypes and conditions, and thus used for subsequent  
504 analysis. Traces of the primary root were manually curated and erroneous data were manually  
505 corrected using the “segmented line” tool in Fiji software. Relative root elongation rate  
506 ( $RER$ ;  $\text{mm mm}^{-1}\text{h}^{-1}$ ) was computed for each root as:

$$507 \quad RER(t) = \frac{dl}{dt} \cdot \frac{1}{t}$$

508 For normalization of average scion size between WT / RNAi and RNAi / WT grafts, 12 DAG  
509 i.e. a week after the grafted seedlings had been transferred onto a new plate as described above,  
510 the first leaf of WT scions was severed from the scion in half of WT / RNAi heterografts using  
511 a fine scalpel, generating WT<sub>AMP</sub> scions, while the other half was left intact. To minimise  
512 potential artefacts due to confounding wounding effects when comparing amputated WT<sub>AMP</sub>  
513 scions and scions left intact (WT or RNAi), one of the cotyledon stumps remaining from the  
514 cotyledons and severed from the latter on 0 DAG, at the time of grafting, was gently squeezed

515 with a pair of very fine tweezers. All plates were scanned daily as previously described.  
516 Primary and secondary lateral root lengths were determined using Fiji software.

517

518 So that quantitative relationships between root system architecture and scion size could be  
519 examined, actual scion sizes were measured in all grafts at the end of each experiment through  
520 destructive sampling. Scions were severed from the rootstock and leaves were laid flat on a  
521 film of 0.8% phytigel, avoiding overlaps, and scanned with a flatbed scanner at a resolution of  
522 2400 dpi, allowing for leaf area measurement using Fiji, and calculation of scion projected  
523 area. The roots were fixed in a fixing solution (Phosphate-buffered saline, 10% (v/v)  
524 Formaldehyde, 0.1% (v/v) Triton-X100), and imaged by light microscopy in DIC mode.  
525 Epidermal cell length profiles along the primary root were determined using the macro “Cell  
526 length profile”. The positions of all non-emerged lateral root primordia (*LRP*) and emerged  
527 lateral roots (*LR*) along the primary root were recorded through imaging the length of the whole  
528 root from hypocotyl junction to root tip. The distance between the most basal (oldest) lateral  
529 root and the most acropetal LRP was defined as the zone of lateral root formation and  
530 emergence. The densities of non-emerged and emerged roots along that zone could then readily  
531 be calculated.

### 532 **Molecular analysis**

533 For qRT-PCR, fresh tissues were snap-frozen in liquid nitrogen and ground using a Tissue  
534 Lyzer (Quiagen). Total RNA was obtained using a chloroform/TRIZol (Thermofisher)  
535 extraction protocol, following manufacturer’s instructions. Messenger RNAs were purified  
536 from 40µg of total RNA using TYGR Dynabeads® oligo dT<sub>25</sub> and subsequently used for cDNA  
537 synthesis using 200u of M-MLV (Promega), following manufacturer’s instructions. The qRT-  
538 PCR reaction was performed with 2.5uL of the diluted reverse transcriptase mix in a final  
539 volume of 10 µL of FastStart Universal SYBR® Green Master (Roche) and using a VIIA7 real  
540 time PCR system (Thermofisher). Primer efficiencies were calculated using LinRegPCR [77]  
541 and relative expression of target genes was normalised to four reference genes (*TIP41*, *APT1*,  
542 *UBC9* and *PDF2*) using the delta-Ct method [78]. The primers used for quantification of  
543 *AtTCTP1* mRNAs are as described in [35]. GFP-specific primers were either GFP1<sub>for</sub>  
544 5’GATCCTGTTGACGAGGGTGT3’, GFP1<sub>rev</sub> 5’GGATACGTGCAGGAGAGGAC3’, or  
545 GFP2<sub>for</sub> 5’GATGCCGTTCTTTTGCTTGTCG and GFP2<sub>rev</sub>  
546 5’CGTGCAGTGCTTCTCCCGTTAC3’. The two sets of primers produced almost identical

547 delta-Ct values, which were thus were averaged to calculate expression levels. Primers used  
548 for quantification of *CycB1;1* expression are CycB1;1<sub>for</sub> 5'TCAGCTCATGGACTGTGCAA3'  
549 and CycB1;1<sub>rev</sub> 5'GATCAAAGCCACAGCGAAGC3'. In all experiments, replication  
550 consisted of 3 to 6 independent pools, each consisting of scion or rootstocks from at least 5  
551 plants, unless specified otherwise.

552

### 553 **Statistical analysis**

554 Data were analysed and plotted using the OriginPro software v9. This includes curve fittings,  
555 tests for equal variance (Levene) and ANOVA analysis of variance followed by post-hoc tests  
556 for pair-wise comparisons (Tukey or Bonferroni, as adequate).

557

### 558 **Gene accessions numbers**

559 *AtAPT1* (*At1g27450*), *AtCyclinB-1* (*At4g37490*), *AtPDF2* (*At1g13320*), *AtTCTP1*  
560 (*At3g16640*), *AtTCTP2* (*At3g05540*), *AtTIP41* (*At4g34270*), *AtUBC9* (*At4g27960*).

561

### 562 **Authors contribution**

563 J.M. initiated the project; R.B. and J.M. conceived the experiments; R.B. performed the  
564 experiments; R.B. and J.M wrote the manuscript

565

### 566 **Data availability**

567 The data supporting the findings of this study are available from the corresponding author upon  
568 reasonable request.

569

570

571 **REFERENCES**

- 572 1. Peret B, Larrieu A, Bennett MJ. Lateral root emergence: a difficult birth. *J Exp Bot.*  
573 2009;60:3637–43. doi:10.1093/jxb/erp232.
- 574 2. Bellini C, Pacurar DI, Perrone I. Adventitious roots and lateral roots: similarities and  
575 differences. *Annu Rev Plant Biol.* 2014;65:639–66. doi:10.1146/annurev-arplant-050213-  
576 035645.
- 577 3. Malamy JE, Benfey PN. Organization and cell differentiation in lateral roots of  
578 *Arabidopsis thaliana*. *Development.* 1997;124:33–44.  
579 <http://www.ncbi.nlm.nih.gov/pubmed/9006065>.
- 580 4. De Smet I, Tetsumura T, De Rybel B, Frey NF d., Laplaze L, Casimiro I, et al. Auxin-  
581 dependent regulation of lateral root positioning in the basal meristem of *Arabidopsis*.  
582 *Development.* 2007;134:681–90. doi:10.1242/dev.02753.
- 583 5. Moreno-Risueno MA, Van Norman JM, Moreno A, Zhang J, Ahnert SE, Benfey PN.  
584 Oscillating Gene Expression Determines Competence for Periodic *Arabidopsis* Root  
585 Branching. *Science (80- )*. 2010;329:1306–11. doi:10.1126/science.1191937.
- 586 6. Benitez-Alfonso Y, Faulkner C, Pendle A, Miyashima S, Helariutta Y, Maule A.  
587 Symplastic Intercellular Connectivity Regulates Lateral Root Patterning. *Dev Cell.*  
588 2013;26:136–47. doi:10.1016/j.devcel.2013.06.010.
- 589 7. Turgeon R, Wolf S. Phloem Transport: Cellular Pathways and Molecular Trafficking.  
590 *Annu Rev Plant Biol.* 2009;60:207–21. doi:10.1146/annurev.arplant.043008.092045.
- 591 8. Batailler B, Lemaître T, Vilaine F, Sanchez C, Renard D, Cayla T, et al. Soluble and  
592 filamentous proteins in *Arabidopsis* sieve elements. *Plant Cell Environ.* 2012;35:1258–73.  
593 doi:10.1111/j.1365-3040.2012.02487.x.
- 594 9. Turnbull CGN, Lopez-Cobollo RM. Heavy traffic in the fast lane: long-distance signalling  
595 by macromolecules. *New Phytol.* 2013;198:33–51. doi:10.1111/nph.12167.
- 596 10. Kim G, LeBlanc ML, Wafula EK, DePamphilis CW, Westwood JH. Genomic-scale  
597 exchange of mRNA between a parasitic plant and its hosts. *Science (80- )*. 2014;345:808–11.  
598 doi:10.1126/science.1253122.
- 599 11. Thieme CJ, Rojas-Triana M, Stecyk E, Schudoma C, Zhang W, Yang L, et al.

- 600 Endogenous Arabidopsis messenger RNAs transported to distant tissues. *Nat Plants*.  
601 2015;1:15025. doi:10.1038/nplants.2015.25.
- 602 12. Notaguchi M, Higashiyama T, Suzuki T. Identification of mRNAs that Move Over Long  
603 Distances Using an RNA-Seq Analysis of Arabidopsis/Nicotiana benthamiana Heterografts.  
604 *Plant Cell Physiol*. 2015;56:311–21. doi:10.1093/pcp/pcu210.
- 605 13. Yang Y, Mao L, Jittayasothorn Y, Kang Y, Jiao C, Fei Z, et al. Messenger RNA  
606 exchange between scions and rootstocks in grafted grapevines. *BMC Plant Biol*.  
607 2015;15:251. doi:10.1186/s12870-015-0626-y.
- 608 14. Zhang W, Thieme CJ, Kollwig G, Apelt F, Yang L, Winter N, et al. tRNA-Related  
609 Sequences Trigger Systemic mRNA Transport in Plants. *Plant Cell*. 2016;28:1237–49.  
610 doi:10.1105/tpc.15.01056.
- 611 15. Xia C, Zheng Y, Huang J, Zhou X, Li R, Zha M, et al. Elucidation of the Mechanisms of  
612 Long-Distance mRNA Movement in a Nicotiana benthamiana /Tomato Heterograft System.  
613 *Plant Physiol*. 2018;177:745–58. doi:10.1104/pp.17.01836.
- 614 16. Atkins CA, Smith PMC, Rodriguez-Medina C. Macromolecules in phloem exudates--a  
615 review. *Protoplasma*. 2011;248:165–72. doi:10.1007/s00709-010-0236-3.
- 616 17. Paultre DSG, Gustin M-P, Molnar A, Oparka KJ. Lost in Transit: Long-Distance  
617 Trafficking and Phloem Unloading of Protein Signals in Arabidopsis Homografts. *Plant Cell*.  
618 2016;28:2016–25. doi:10.1105/tpc.16.00249.
- 619 18. Jorgensen RA, Atkinson RG, Forster RLS, Lucas WJ. An RNA-Based Information  
620 Superhighway in Plants. *Science* (80- ). 1998;279:1486 LP-1487.  
621 doi:10.1126/science.279.5356.1486.
- 622 19. Lough TJ, Lucas WJ. Integrative Plant Biology: Role of Phloem Long-Distance  
623 Macromolecular Trafficking. *Annu Rev Plant Biol*. 2006;57:203–32.  
624 doi:10.1146/annurev.arplant.56.032604.144145.
- 625 20. Calderwood A, Kopriva S, Morris RJ. Transcript Abundance Explains mRNA Mobility  
626 Data in Arabidopsis thaliana. *Plant Cell*. 2016;28:610–5. doi:10.1105/tpc.15.00956.
- 627 21. Kehr J, Kragler F. Long distance RNA movement. *New Phytol*. 2018;218:29–40.  
628 doi:10.1111/nph.15025.

- 629 22. Morris RJ. On the selectivity, specificity and signalling potential of the long-distance  
630 movement of messenger RNA. *Curr Opin Plant Biol.* 2018;43:1–7.  
631 doi:10.1016/j.pbi.2017.11.001.
- 632 23. Corbesier L, Vincent C, Jang S, Fornara F, Fan Q, Searle I, et al. FT Protein Movement  
633 Contributes to Long-Distance Signaling in Floral Induction of Arabidopsis. *Science* (80- ).  
634 2007;316:1030–3. doi:10.1126/science.1141752.
- 635 24. Jaeger KE, Wigge P a. FT Protein Acts as a Long-Range Signal in Arabidopsis. *Curr*  
636 *Biol.* 2007;17:1050–4. doi:10.1016/j.cub.2007.05.008.
- 637 25. Haywood V, Yu T-S, Huang N-C, Lucas WJ. Phloem long-distance trafficking of  
638 GIBBERELLIC ACID-INSENSITIVE RNA regulates leaf development. *Plant J.*  
639 2005;42:49–68. doi:10.1111/j.1365-313X.2005.02351.x.
- 640 26. Kim M, Canio W, Kessler S, Sinha N. Developmental Changes Due to Long-Distance  
641 Movement of a Homeobox Fusion Transcript in Tomato. *Science* (80- ). 2001;293:287–9.  
642 doi:10.1126/science.1059805.
- 643 27. Banerjee AK, Lin T, Hannapel DJ. Untranslated regions of a mobile transcript mediate  
644 RNA metabolism. *Plant Physiol.* 2009;151:1831–43. doi:10.1104/pp.109.144428.
- 645 28. Notaguchi M, Wolf S, Lucas WJ. Phloem-Mobile Aux / IAA Transcripts Target to the  
646 Root Tip and Modify Root Architecture F. *J Integr Plant Biol.* 2012;54:760–72.  
647 doi:10.1111/j.1744-7909.2012.01155.x.
- 648 29. Toscano-Morales R, Xoconostle-Cázares B, Martínez-Navarro AC, Ruiz-Medrano R.  
649 Long distance movement of an Arabidopsis Translationally Controlled Tumor Protein  
650 (AtTCTP2) mRNA and protein in tobacco. *Front Plant Sci.* 2014;5 December:705.  
651 doi:10.3389/fpls.2014.00705.
- 652 30. Zhang Z, Zheng Y, Ham B-K, Chen J, Yoshida A, Kochian L V., et al. Vascular-  
653 mediated signalling involved in early phosphate stress response in plants. *Nat Plants.*  
654 2016;2:16033. doi:10.1038/nplants.2016.33.
- 655 31. Hsu Y-C, Chern JJ, Cai Y, Liu M, Choi K-W. Drosophila TCTP is essential for growth  
656 and proliferation through regulation of dRheb GTPase. *Nature.* 2007;445:785–8.  
657 doi:10.1038/nature05528.
- 658 32. Dong X, Yang B, Li Y, Zhong C, Ding J. Molecular Basis of the Acceleration of the

- 659 GDP-GTP Exchange of Human Ras Homolog Enriched in Brain by Human Translationally  
660 Controlled Tumor Protein. *J Biol Chem.* 2009;284:23754–64. doi:10.1074/jbc.M109.012823.
- 661 33. Bommer U-A, Thiele B-J. The translationally controlled tumour protein (TCTP). *Int J*  
662 *Biochem Cell Biol.* 2004;36:379–85. doi:10.1016/S1357-2725(03)00213-9.
- 663 34. Bommer U-A. The Translational Controlled Tumour Protein TCTP: Biological Functions  
664 and Regulation. In: Telerman A, Amson R, editors. *TCTP/tpt1 - Remodeling Signaling from*  
665 *Stem Cell to Disease.* Cham: Springer International Publishing; 2017. p. 69–126.  
666 doi:10.1007/978-3-319-67591-6\_4.
- 667 35. Berkowitz O, Jost R, Pollmann S, Masle J. Characterization of TCTP, the Translationally  
668 Controlled Tumor Protein, from *Arabidopsis thaliana*. *Plant Cell Online.* 2008;20:3430–47.  
669 doi:10.1105/tpc.108.061010.
- 670 36. Brioudes F, Thierry A-M, Chambrier P, Mollereau B, Bendahmane M. Translationally  
671 controlled tumor protein is a conserved mitotic growth integrator in animals and plants. *Proc*  
672 *Natl Acad Sci U S A.* 2010;107:16384–9. doi:10.1073/pnas.1007926107.
- 673 37. Chen SH, Wu P-S, Chou C-H, Yan Y-T, Liu H, Weng S-Y, et al. A Knockout Mouse  
674 Approach Reveals that TCTP Functions as an Essential Factor for Cell Proliferation and  
675 Survival in a Tissue- or Cell Type-specific Manner. *Mol Biol Cell.* 2007;18:2525–32.  
676 doi:10.1091/mbc.e07-02-0188.
- 677 38. Cao B, Lu Y, Chen G, Lei J. Functional characterization of the translationally controlled  
678 tumor protein (TCTP) gene associated with growth and defense response in cabbage. *Plant*  
679 *Cell, Tissue Organ Cult.* 2010;103:217–26. doi:10.1007/s11240-010-9769-6.
- 680 39. Kim Y-M, Han Y-J, Hwang O-J, Lee S-S, Shin A-Y, Kim SY, et al. Overexpression of  
681 *Arabidopsis* translationally controlled tumor protein gene *AtTCTP* enhances drought  
682 tolerance with rapid ABA-induced stomatal closure. *Mol Cells.* 2012;33:617–26.  
683 doi:10.1007/s10059-012-0080-8.
- 684 40. Deng Z, Chen J, Leclercq J, Zhou Z, Liu C, Liu H, et al. Expression Profiles,  
685 Characterization and Function of HbTCTP in Rubber Tree (*Hevea brasiliensis*). *Front Plant*  
686 *Sci.* 2016;7. doi:10.3389/fpls.2016.00789.
- 687 41. Li D, Deng Z, Liu X, Qin B. Molecular cloning, expression profiles and characterization  
688 of a novel translationally controlled tumor protein in rubber tree (*Hevea brasiliensis*). *J Plant*

- 689 Physiol. 2013;170:497–504. doi:10.1016/j.jplph.2012.11.014.
- 690 42. Chen Y, Chen X, Wang H, Bao Y, Zhang W. Examination of the leaf proteome during  
691 flooding stress and the induction of programmed cell death in maize. *Proteome Sci.*  
692 2014;12:1–18.
- 693 43. de Carvalho M, Acencio ML, Laitz AVN, de Araújo LM, de Lara Campos Arcuri M, do  
694 Nascimento LC, et al. Impacts of the overexpression of a tomato translationally controlled  
695 tumor protein (TCTP) in tobacco revealed by phenotypic and transcriptomic analysis. *Plant*  
696 *Cell Rep.* 2017;36:887–900. doi:10.1007/s00299-017-2117-0.
- 697 44. Malter D, Wolf S. Melon phloem-sap proteome: developmental control and response to  
698 viral infection. *Protoplasma.* 2011;248:217–24. doi:10.1007/s00709-010-0215-8.
- 699 45. Du B, Wei Z, Wang Z, Wang X, Peng X, Du B, et al. Phloem-exudate proteome analysis  
700 of response to insect brown plant-hopper in rice. *J Plant Physiol.* 2015;183:13–22.  
701 doi:10.1016/j.jplph.2015.03.020.
- 702 46. Gawehns F, Ma L, Bruning O, Houterman PM, Boeren S, Cornelissen BJC, et al. The  
703 effector repertoire of *Fusarium oxysporum* determines the tomato xylem proteome  
704 composition following infection. *Front Plant Sci.* 2015;6 November:967.  
705 doi:10.3389/fpls.2015.00967.
- 706 47. MacDonald SM, Rafnar T, Langdon J, Lichtenstein LM. Molecular identification of an  
707 IgE-dependent histamine-releasing factor. *Science.* 1995;269:688–90.  
708 <http://www.ncbi.nlm.nih.gov/pubmed/7542803>. Accessed 14 Jan 2015.
- 709 48. MacDonald S. Potential role of histamine releasing factor (HRF) as a therapeutic target  
710 for treating asthma and allergy. *J Asthma Allergy.* 2012;5:51. doi:10.2147/JAA.S28868.
- 711 49. MacDonald SM. History of Histamine-Releasing Factor (HRF)/Translationally  
712 Controlled Tumor Protein (TCTP) Including a Potential Therapeutic Target in Asthma and  
713 Allergy BT - TCTP/tpt1 - Remodeling Signaling from Stem Cell to Disease. In: Telerman A,  
714 Amson R, editors. Cham: Springer International Publishing; 2017. p. 291–308.
- 715 50. Aoki K, Suzui N, Fujimaki S, Dohmae N, Yonekura-Sakakibara K, Fujiwara T, et al.  
716 Destination-selective long-distance movement of phloem proteins. *Plant Cell.* 2005;17:1801–  
717 14. doi:10.1105/tpc.105.031419.
- 718 51. Stadler R, Wright KM, Lauterbach C, Amon G, Gahrtz M, Feuerstein A, et al. Expression



- 719 of GFP-fusions in Arabidopsis companion cells reveals non-specific protein trafficking into  
720 sieve elements and identifies a novel post-phloem domain in roots. *Plant J.* 2005;41:319–31.  
721 doi:10.1111/j.1365-313X.2004.02298.x.
- 722 52. Ross-Elliott TJ, Jensen KH, Haaning KS, Wager BM, Knoblauch J, Howell AH, et al.  
723 Phloem unloading in Arabidopsis roots is convective and regulated by the phloem-pole  
724 pericycle. *Elife.* 2017;6:1–31. doi:10.7554/eLife.24125.
- 725 53. Melnyk CW, Schuster C, Leyser O, Meyerowitz EM. A Developmental Framework for  
726 Graft Formation and Vascular Reconnection in Arabidopsis thaliana. *Curr Biol.*  
727 2015;25:1306–18. doi:10.1016/j.cub.2015.03.032.
- 728 54. Liang D, White RG, Waterhouse PM. Gene Silencing in Arabidopsis Spreads from the  
729 Root to the Shoot, through a Gating Barrier, by Template-Dependent, Nonvascular, Cell-to-  
730 Cell Movement. *PLANT Physiol.* 2012;159:984–1000. doi:10.1104/pp.112.197129.
- 731 55. Molnar A, Melnyk CW, Bassett A, Hardcastle TJ, Dunn R, Baulcombe DC. Small  
732 silencing RNAs in plants are mobile and direct epigenetic modification in recipient cells.  
733 *Science (80- )*. 2010;328:872–5. doi:10.1126/science.1187959.
- 734 56. Melnyk CW, Molnar A, Bassett A, Baulcombe DC. Mobile 24 nt small RNAs direct  
735 transcriptional gene silencing in the root meristems of Arabidopsis thaliana. *Curr Biol.*  
736 2011;21:1678–83. doi:10.1016/j.cub.2011.08.065.
- 737 57. Bai S, Kasai A, Yamada K, Li T, Harada T. A mobile signal transported over a long  
738 distance induces systemic transcriptional gene silencing in a grafted partner. *J Exp Bot.*  
739 2011;62:4561–70. doi:10.1093/jxb/err163.
- 740 58. Beeckman T, Burssens S, Inzé D. The peri-cell-cycle in Arabidopsis. *J Exp Bot.* 2001;52  
741 Spec Issue:403–11. doi:10.1093/jexbot/52.suppl\_1.403.
- 742 59. Barreau C, Paillard L, Osborne HB. AU-rich elements and associated factors: are there  
743 unifying principles? *Nucleic Acids Res.* 2005;33:7138–50. doi:10.1093/nar/gki1012.
- 744 60. Mouchel CF, Briggs GC, Hardtke CS. Natural genetic variation in Arabidopsis identifies  
745 BREVIS RADIX, a novel regulator of cell proliferation and elongation in the root. *Genes*  
746 *Dev.* 2004;18:700–14. doi:10.1101/gad.1187704.
- 747 61. Lee-Ho E, Walton LJ, Reid DM, Yeung EC, Kurepin L V. Effects of elevated carbon  
748 dioxide and sucrose concentrations on Arabidopsis thaliana root architecture and anatomy.

- 749 Can J Bot. 2007;85:324–30. doi:10.1139/B07-009.
- 750 62. Freixes S, Thibaud M-C, Tardieu F, Muller B. Root elongation and branching is related to  
751 local hexose concentration in *Arabidopsis thaliana* seedlings. Plant, Cell Environ.  
752 2002;25:1357–66. doi:10.1046/j.1365-3040.2002.00912.x.
- 753 63. MacGregor DR, Deak KI, Ingram PA, Malamy JE. Root System Architecture in  
754 *Arabidopsis* Grown in Culture Is Regulated by Sucrose Uptake in the Aerial Tissues. Plant  
755 Cell Online. 2008;20:2643–60. doi:10.1105/tpc.107.055475.
- 756 64. Laskowski M, Grieneisen VA, Hofhuis H, Hove CA Ten, Hogeweg P, Marée AFM, et al.  
757 Root system architecture from coupling cell shape to auxin transport. PLoS Biol.  
758 2008;6:e307. doi:10.1371/journal.pbio.0060307.
- 759 65. Lewis DR, Negi S, Sukumar P, Muday GK. Ethylene inhibits lateral root development,  
760 increases IAA transport and expression of PIN3 and PIN7 auxin efflux carriers.  
761 Development. 2011;138:3485–95. doi:10.1242/dev.065102.
- 762 66. Raya-González J, Pelagio-Flores R, López-Bucio J. The jasmonate receptor COI1 plays a  
763 role in jasmonate-induced lateral root formation and lateral root positioning in *Arabidopsis*  
764 *thaliana*. J Plant Physiol. 2012;169:1348–58. doi:10.1016/j.jplph.2012.05.002.
- 765 67. De Smet I, Lau S, Voss U, Vanneste S, Benjamins R, Rademacher EH, et al. Bimodular  
766 auxin response controls organogenesis in *Arabidopsis*. Proc Natl Acad Sci. 2010;107:2705–  
767 10. doi:10.1073/pnas.0915001107.
- 768 68. Dubrovsky JG, Sauer M, Napsucially-Mendivil S, Ivanchenko MG, Friml J, Shishkova S,  
769 et al. Auxin acts as a local morphogenetic trigger to specify lateral root founder cells. Proc  
770 Natl Acad Sci. 2008;105:8790–4. doi:10.1073/pnas.0712307105.
- 771 69. De Rybel B, Vassileva V, Parizot B, Demeulenaere M, Grunewald W, Audenaert D, et al.  
772 A Novel Aux/IAA28 Signaling Cascade Activates GATA23-Dependent Specification of  
773 Lateral Root Founder Cell Identity. Curr Biol. 2010;20:1697–706.  
774 doi:10.1016/j.cub.2010.09.007.
- 775 70. Muraro D, Byrne H, King J, Bennett M. The role of auxin and cytokinin signalling in  
776 specifying the root architecture of *Arabidopsis thaliana*. J Theor Biol. 2013;317:71–86.  
777 doi:10.1016/j.jtbi.2012.08.032.
- 778 71. Peret B, Swarup K, Ferguson A, Seth M, Yang Y, Dhondt S, et al. AUX/LAX Genes

- 779 Encode a Family of Auxin Influx Transporters That Perform Distinct Functions during  
780 Arabidopsis Development. *Plant Cell*. 2012;24:2874–85. doi:10.1105/tpc.112.097766.
- 781 72. Casimiro I. Auxin Transport Promotes Arabidopsis Lateral Root Initiation. *Plant Cell*  
782 *Online*. 2001;13:843–52. doi:10.1105/tpc.13.4.843.
- 783 73. Cans C, Passer B. Translationally controlled tumor protein acts as a guanine nucleotide  
784 dissociation inhibitor on the translation elongation factor eEF1A. *Proc ....* 2003.  
785 <http://www.pnas.org/content/100/24/13892.short>. Accessed 15 Jan 2015.
- 786 74. Wu H, Gong W, Yao X, Wang J, Perrett S, Feng Y. Evolutionarily Conserved Binding of  
787 Translationally Controlled Tumor Protein to Eukaryotic Elongation Factor 1B. *J Biol Chem*.  
788 2015;290:8694–710. doi:10.1074/jbc.M114.628594.
- 789 75. Marsch-Martínez N, Franken J, Gonzalez-Aguilera KL, de Folter S, Angenent G,  
790 Alvarez-Buylla ER. An efficient flat-surface collar-free grafting method for Arabidopsis  
791 thaliana seedlings. *Plant Methods*. 2013;9:14. doi:10.1186/1746-4811-9-14.
- 792 76. French A, Ubeda-Tomas S, Holman TJ, Bennett MJ, Pridmore T. High-Throughput  
793 Quantification of Root Growth Using a Novel Image-Analysis Tool. *PLANT Physiol*.  
794 2009;150:1784–95. doi:10.1104/pp.109.140558.
- 795 77. Ramakers C, Ruijter JM, Deprez RHL, Moorman AFM. Assumption-free analysis of  
796 quantitative real-time polymerase chain reaction (PCR) data. *Neurosci Lett*. 2003;339:62–6.  
797 doi:10.1016/S0304-3940(02)01423-4.
- 798 78. Livak KJ, Schmittgen TD. Analysis of Relative Gene Expression Data Using Real-Time  
799 Quantitative PCR and the  $2^{-\Delta\Delta CT}$  Method. *Methods*. 2001;25:402–8.  
800 doi:10.1006/meth.2001.1262.

801

## 802 **Supplementary data**

803 **Supplementary Figure 1.** TCTP1-GFP fluorescence is restricted to specific strands along the  
804 vasculature.

805

806 **Supplementary Fig. 2.** Distinctive GFP fluorescence pattern in roots grafted to a  
807 *pTCTP1::gTCTP1-GFP* scion compared to a *p35S::GFP* scion

808 **Supplementary Fig. 3.** Time course of appearance of TCTP1-GFP fluorescence in  
809 *pTCTP1::gTCTP1-GFP* / WT heterografts.

810 **Supplementary Fig. 4.** Kinetics of scion expansion in homografts and heterografts between  
811 WT and TCTP-RNAi seedlings.

812 **Supplementary Fig. 5.** Similar scion and primary root sizes in WT<sub>AMP</sub> and TCTP1-RNAi  
813 scions following scion size normalisation

814 **Supplementary Fig. 6.** Root patterning in TCTP1-RNAi seedlings shows no deviation from  
815 the stereotypical structure of WT Arabidopsis roots

816 **Supplementary Fig. 7.** At same scion size, primary and overall lateral root lengths are  
817 independent of TCTP1 expression in scion and mobility to rootstock

818 **Supplementary Fig. 8.** The auxin transport inhibitor NPA does not modify GFP fluorescence  
819 of scion-derived TCTP1-GFP protein in the root.

820

821 **Supplementary Table 1.** Detection of TCTP/TCTP-like messengers or proteins' presence in  
822 the vasculature or movement through graft junctions, in published studies or databases.

FIGURE 1

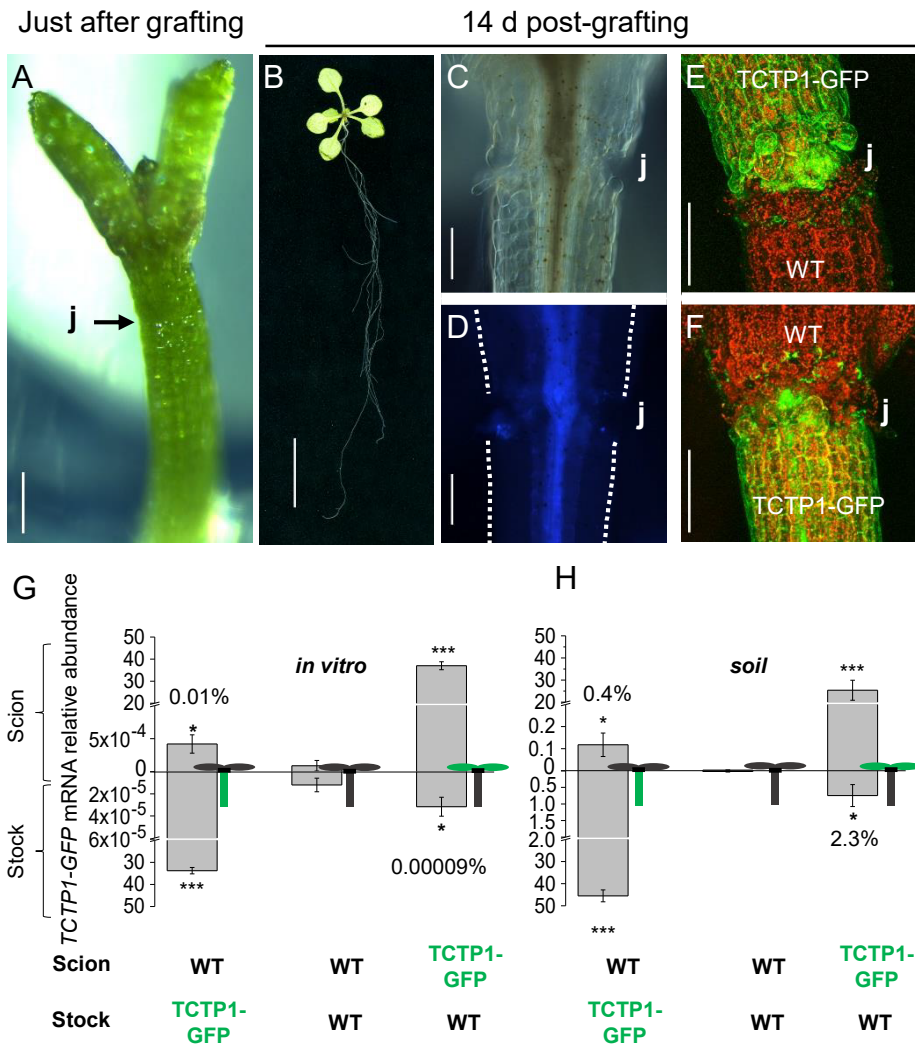

**Fig. 1. *AtTCTP1* mRNA moves over hypocotylar graft junctions in young and adult plants, in variable proportions.**

**A-D**, Representative images of: scion-root stock junction (j) immediately after grafting (**A**); whole seedling (**B**) and graft junction (**C-D**) 14 DAG. DIC image (**C**) and autofluorescence image (**D**). Scale bars, 250  $\mu$ m (**A**), 10 mm (**B**), 200  $\mu$ m (**C** and **D**). **E** and **F**, TCTP1-GFP fluorescence at the graft junction imaged by confocal microscopy. WT root grafted to *pTCTP1::gTCTP1-GFP* scion (**E**) and WT scion grafted to *pTCTP1::gTCTP1-GFP* root (**F**). Scale bar, 200  $\mu$ m. **G** and **H**, *AtTCTP1-GFP* and endogenous *AtTCTP1* transcripts were quantified by qRT-PCR, in the scion (values above x-axis) and root-stock (values below x-axis) of reciprocal grafts between WT and transgenic *pTCTP1::gTCTP1-GFP* seedlings grown *in vitro* and sampled at 14 DAG (**G**) or transferred to soil 10 DAG and sampled at 80 DAG (**H**). Scion-root stock combinations are indicated below each panel, and schematised beside each bar. Values are means  $\pm$  S.E. of fold-change in target gene expression relative to expression of four reference genes (*in vitro* seedlings: n = 5 biological replicates each consisting of pooled rosettes or root-stocks from 5 plants; soil-grown plants: n  $\geq$  6 biological replicates, each consisting of pooled rosettes or root-stocks from 2 plants). Asterisks denote statistically significant expression differences compared to WT / WT control homograft by one tail Student's T-test (\*  $P < 0.05$ ; \*\*\*  $P < 0.001$ ). Similar results were obtained with two sets of GFP-specific primers as listed in Methods.

FIGURE 2

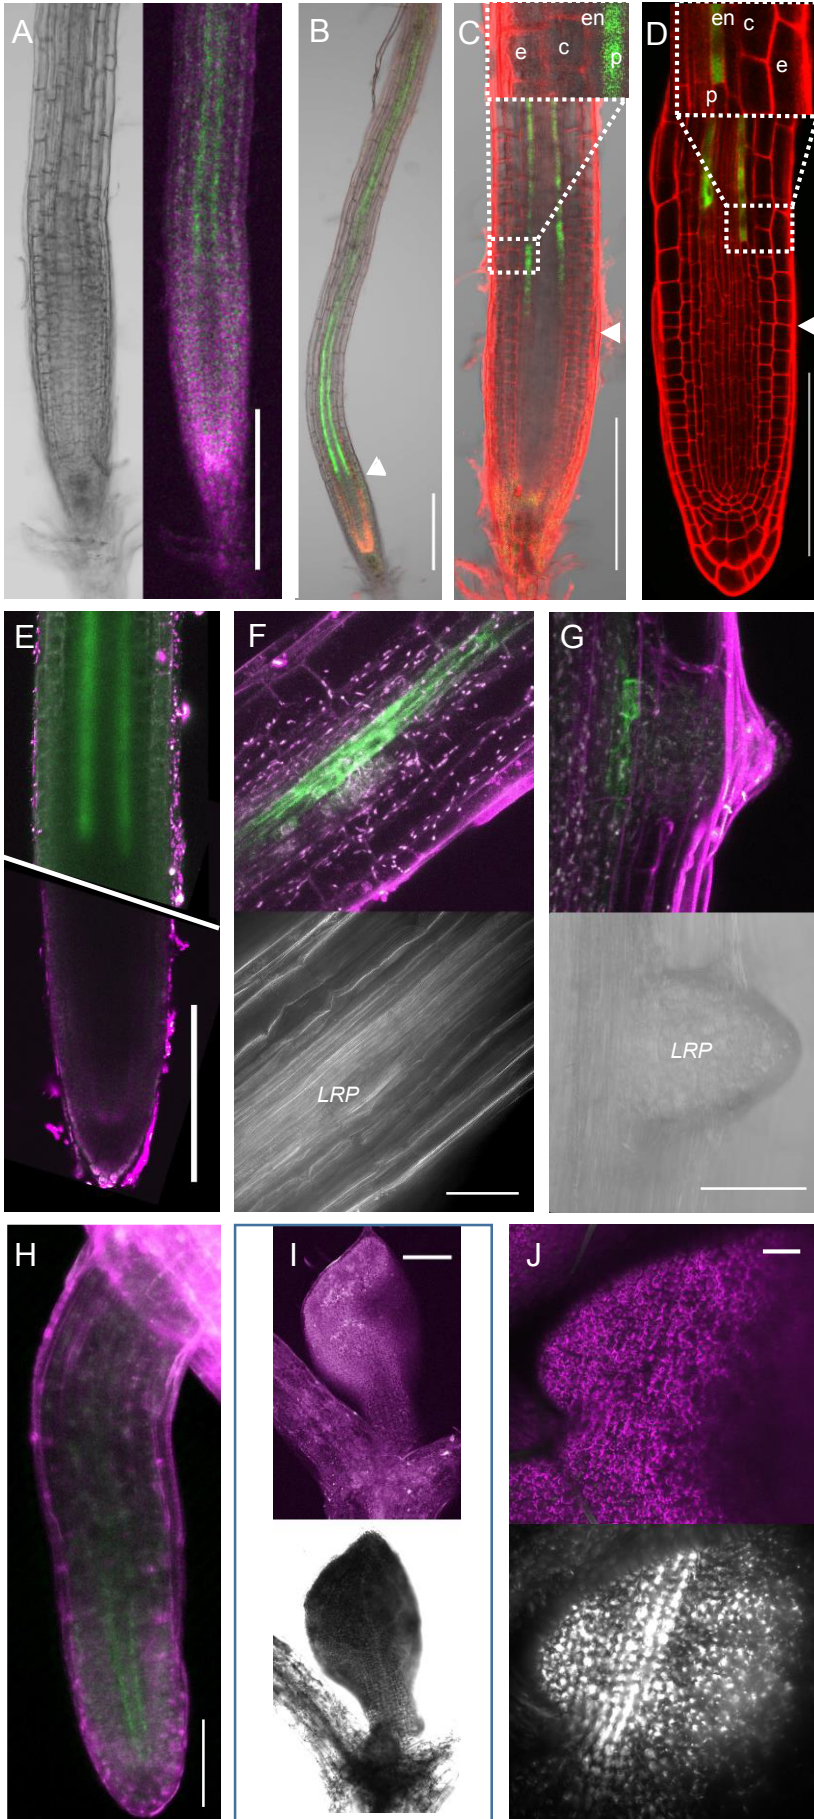

**Fig. 2. TCTP1-GFP distribution in grafted WT rootstock is restricted to the pericycle, with preferential accumulation in phloem-pericycle cells at sites of lateral root formation**

**A-H** Confocal laser microscopy images of WT roots grafted onto scions expressing *pTCTP1::gTCTP1-GFP* (**A-C** and **E-H**) or *p35S::cYFP-TCTP1* (**D**). Roots were imaged in seedlings grown in agar plates, 8 DAG (**A**) or 13 DAG (**B-D**) ( $n \geq 30$  primary roots), and in flowering soil-grown plants, 80 DAG (**E-H**),  $n \geq 10$ ; primary root and LRP (**E-G**); elongating lateral root (**H**). Note the localisation of the GFP fluorescence in parallel strands, the increasing signal closest to the root tip and the preferential accumulation of the GFP-tagged TCTP1 protein in phloem-pole pericycle cells (**C-D** and **F-G**) at the sites of lateral root initiation (label LRP in **F-G**). GFP fluorescence (green) and auto-fluorescence (magenta/red) were separated by spectral unmixing. Inserts in **C** and **D** show TCTP1-GFP (**C**) and YFP-TCTP1 (**D**) localisation, respectively, in the pericycle (p); GFP fluorescence was undetectable in the epidermis (e), the endodermis (en), or the cortex (c). **I-J**, Absence of detectable GFP fluorescence signal in WT scions grafted to *pTCTP1::gTCTP1-GFP* roots, 8 DAG in agar-grown plants (**I**) or 80 DAG in soil-grown

FIGURE 3

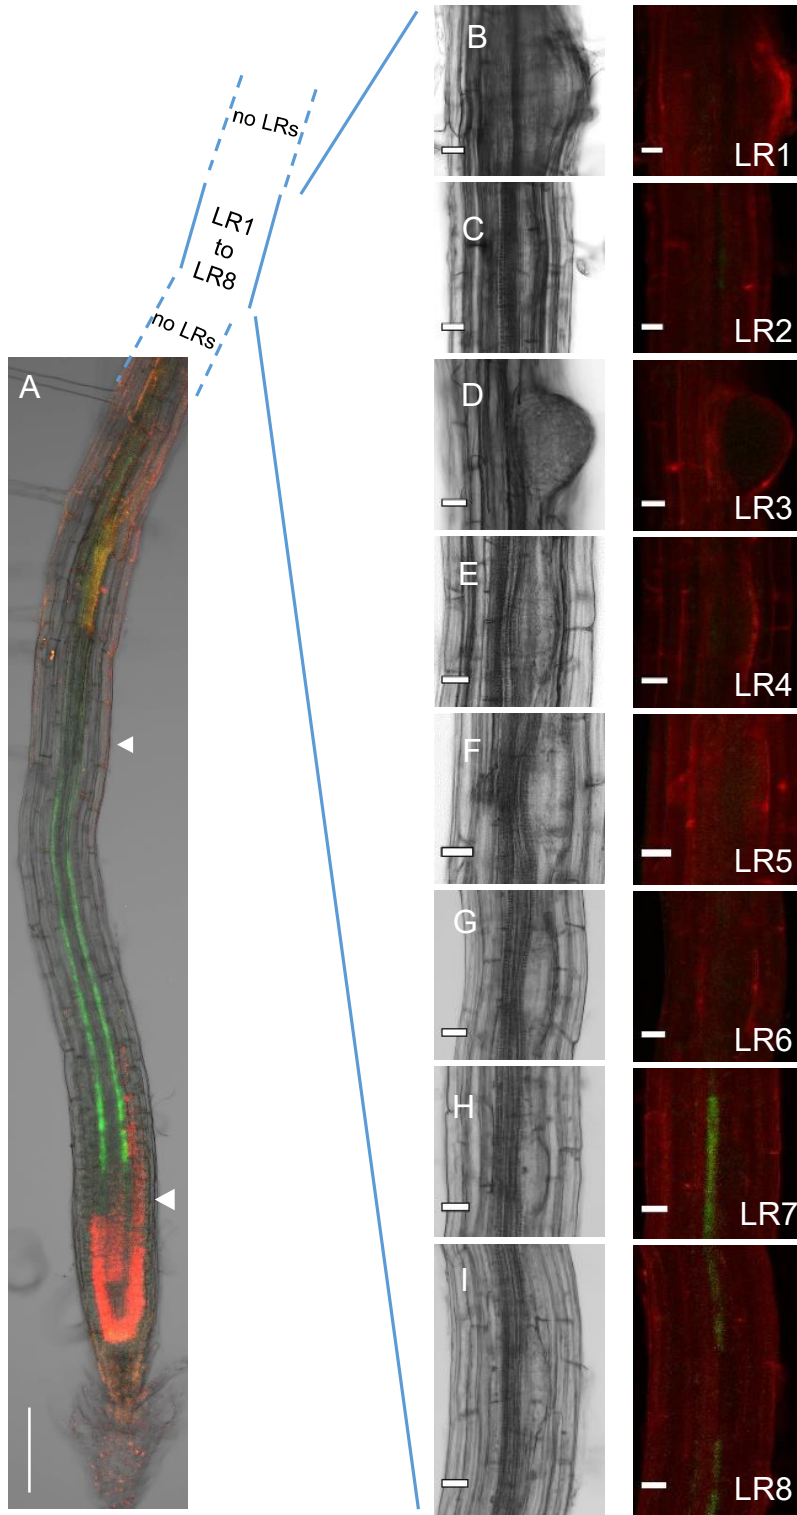

**Fig. 3. Scion-derived TCTP1-GFP fluorescence in grafted WT rootstocks is first detected at the most apical lateral root initiation sites.** **A**, Confocal laser scanning microscopy image of a WT primary root grafted to a scion expressing *pTCTP1::gTCTP1-GFP*, 7 DAG. Scale bar, 200  $\mu$ m. **B** to **I**, CLSM images of lateral root primordia along the primary root, from the most distal (**B**) to the most apical primordium (**I**) closest to the root tip, just above the zone of *LRP* priming. For each primordium, transmission channel on the left, fluorescence channel on the right. TCTP1-GFP fluorescence (green) is only visible at the initiation sites of the two youngest *LRP* primordia (**M** and **N**). Scale bars, 20  $\mu$ m.

FIGURE 4

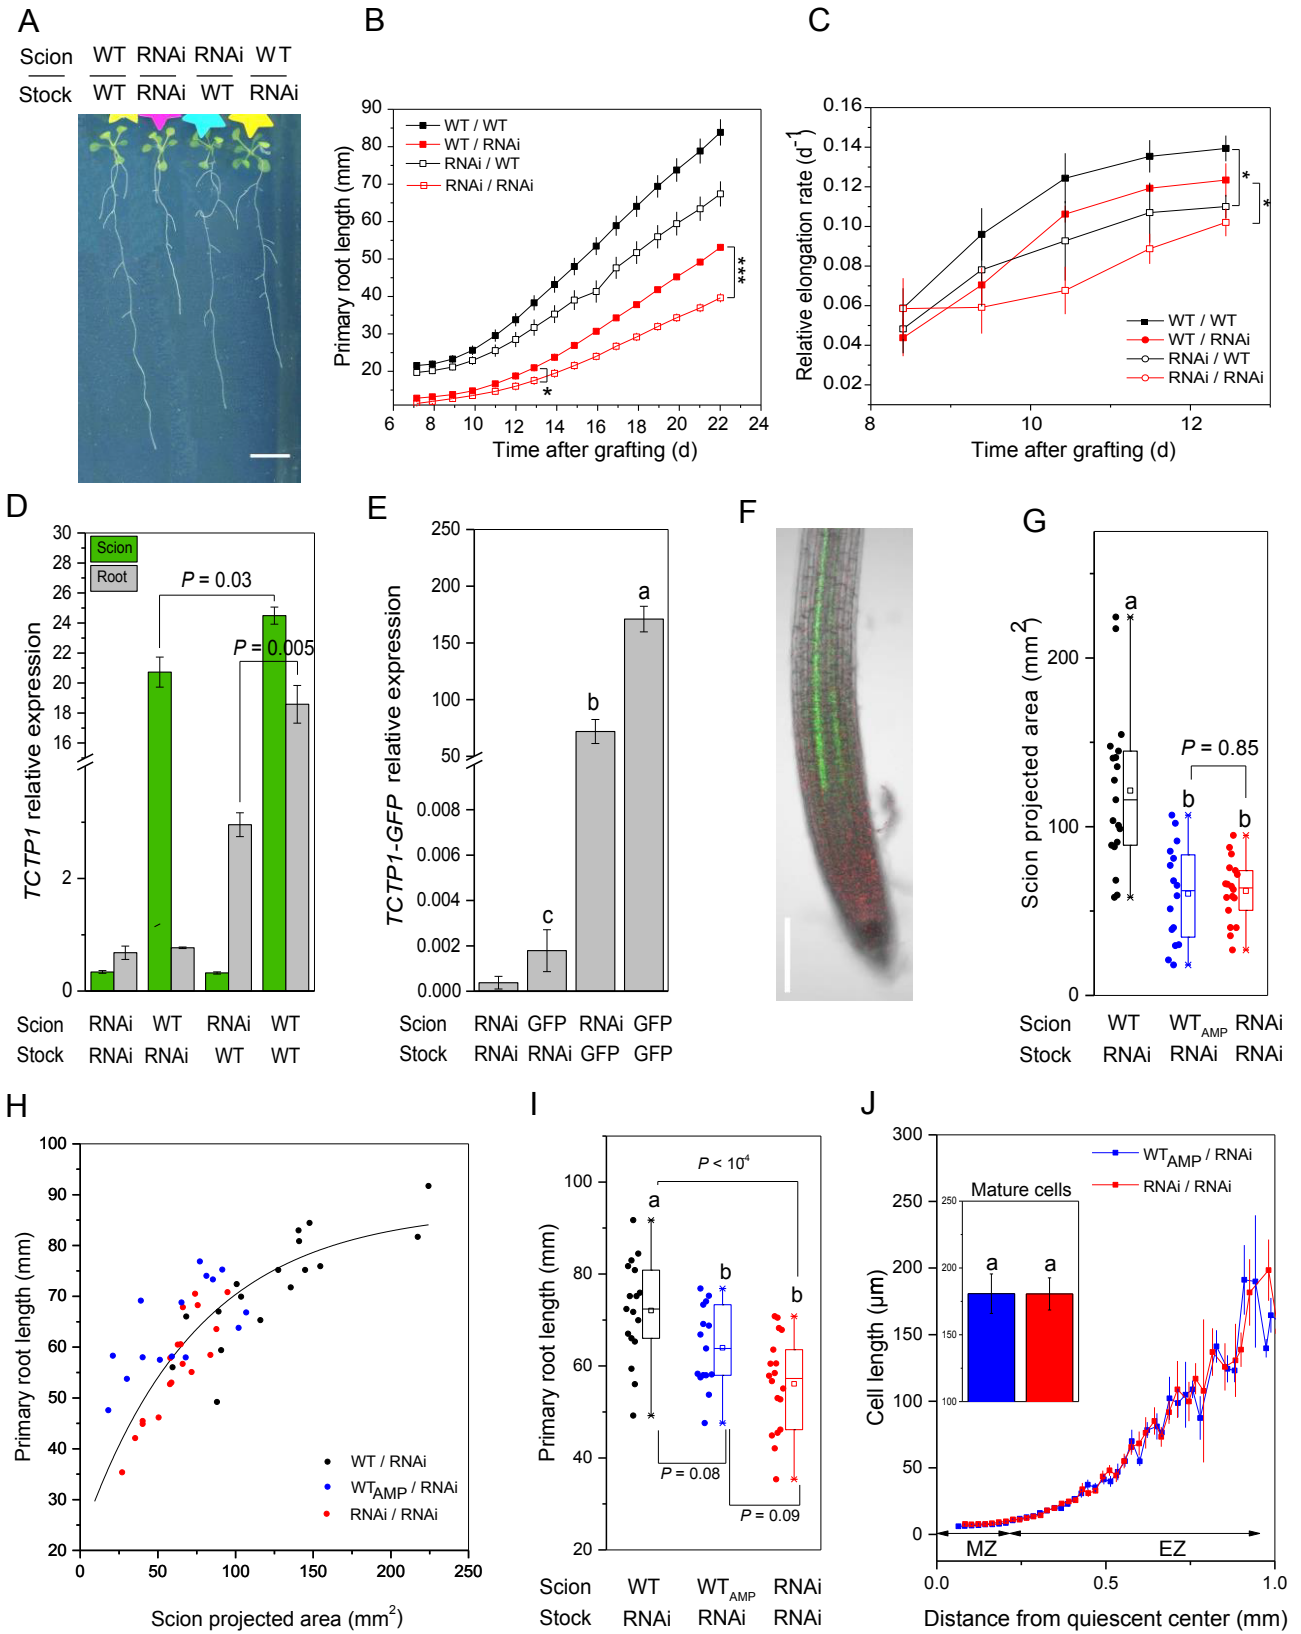



**Fig. 4. Constitutive expression of *AtTCTP1* in scion promotes scion growth which in turn stimulates primary root elongation**

**A**, Representative images of reciprocal grafts between WT and *TCTP1*-RNAi lines, and control WT / WT and *TCTP1*-RNAi / *TCTP1*-RNAi homografts, 22 DAG. Scale bar, 10 mm. **B** and **C**, Primary root lengths (**B**) and relative root elongation rates (**C**) *versus* time. Means  $\pm$  SE,  $n = 6-9$ . Asterisks in **B** denote statistically significant differences by two tails Student's T-test; \*  $P < 0.05$ ; \*\*\*  $P < 0.001$ . **D**, *AtTCTP1* relative gene expression levels in rootstocks and scions, 22 DAG (means  $\pm$  SE,  $n = 3$  pools of at least 5 plants each). Probability levels ( $P$ ) of statistical significance was determined by two tails Student's T-test. **E**, *AtTCTP1-GFP* relative expression in the rootstock of reciprocal grafts between *TCTP1*-RNAi and *TCTP1*-GFP lines (denoted for brevity "RNAi" and "GFP", respectively, in the Figure), and control homografts. Different letters indicate statistically significant differences, above noise levels in roots from RNAi/RNAi grafts (one-way ANOVA and Tuckey's test,  $n = 4$  pools of  $\geq 6$  roots). **F**, Representative image of GFP fluorescence in *TCTP1*-RNAi roots grafted to *TCTP1*-GFP scions. Scale bar, 200  $\mu\text{m}$ . **G** to **J**, Comparison of grafted seedlings sharing the same rootstock (*TCTP1*-RNAi) but differing in scion genotype or size ("AMP" subscript denotes WT scions trimmed 7 DAG, see Methods): **G**, scion sizes 18 DAG; **H**, individual primary root lengths *versus* scion projected area; **I**, primary root lengths. **G** to **I**, Dots represent individual seedlings,  $n = 16-19$  seedlings per graft type; **G-I**, boxes show median, first and third quartiles, and upper and lower whiskers give a graphic representation of the interval containing all data points within  $\pm [1.5 \times (Q_3 - Q_1)]$  range. **J**, Epidermal cell lengths along the primary root meristem (MZ) and elongation zone (EZ),  $n = 5$  roots per graft type. Shown are moving averages of cellular lengths over 20 $\mu\text{m}$  windows. The inset depicts mature cell lengths (means  $\pm$  SE). Different letters in **G**, **I** and **J** denote statistically significant differences by Student's T-test ( $P < 0.05$  unless indicated).

FIGURE 5

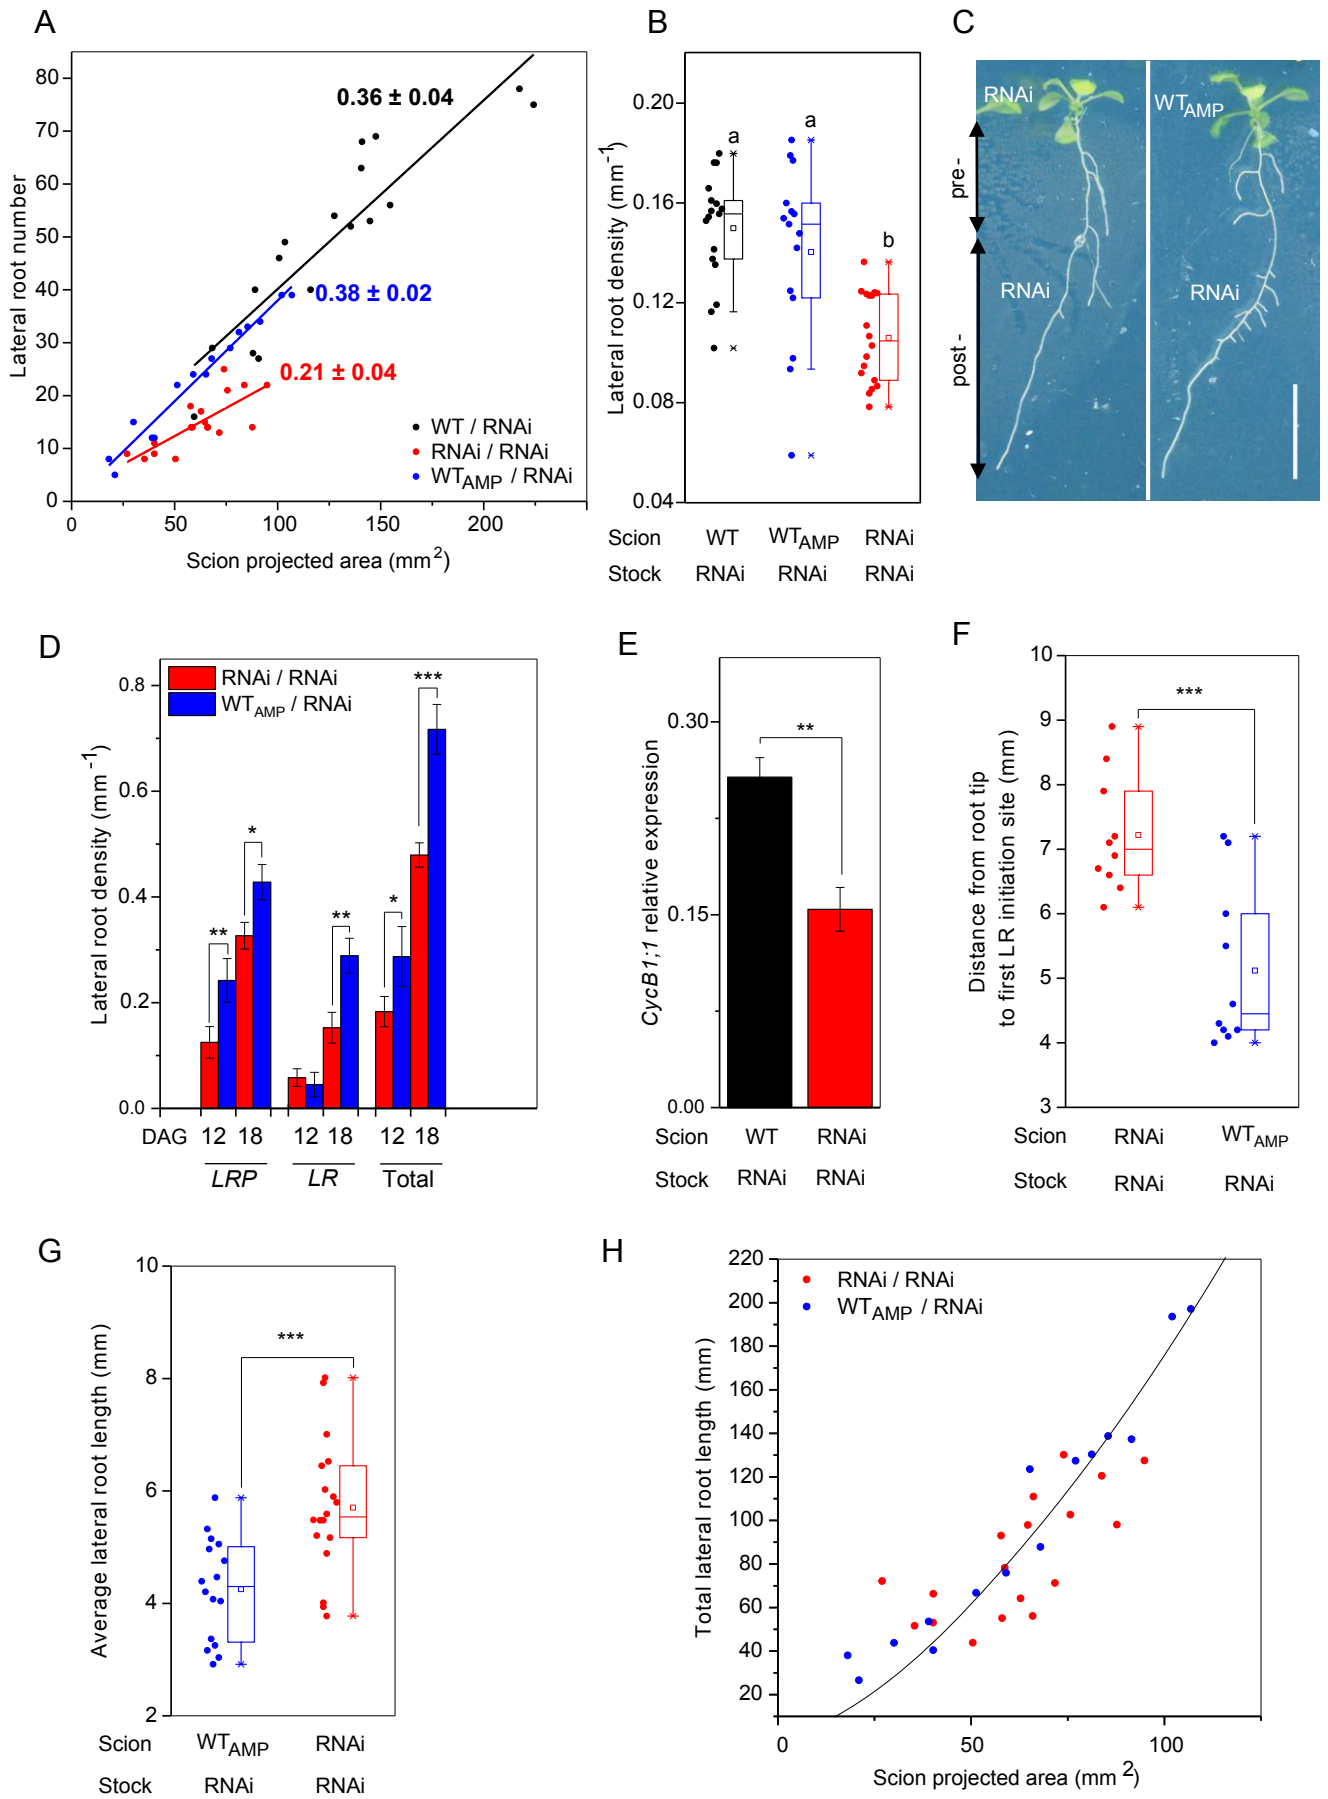

### Fig. 5. Rootward TCTP1 movement promotes lateral root initiation and emergence

**A**, Lateral root number as a function of scion projected area; linear regression lines and slopes  $\pm$  SE are shown for each set of grafts,  $n = 15-17$ . **B**, Lateral root density (number of lateral roots per unit length of primary root). Different letters indicate statistically significant differences by one-way ANOVA followed by Bonferroni posthoc test,  $n = 15-17$  roots. **C**, Representative photographs of a *TCTP1*-RNAi / *TCTP1*-RNAi homograft (left) and a *WT<sub>AMP</sub>* / *TCTP1*-RNAi heterograft (right), 18 DAG: “pre-“ and “post” denote the portion of primary root formed pre- and post-grafting and scion size normalization (0 mm - 8 mm and 10 mm to root tip, respectively). Scale bar, 10 mm. **D**, Lateral root density on the primary root portion formed after scion size normalization. *LRP* and *LR* denote non-emerged Lateral Root Primordia and elongating Lateral Roots, respectively. Means  $\pm$  SE,  $n = 14$  roots. **E**, *Cyclin B1;1* relative expression measured by qRT-PCR in rootstocks sampled 10 DAG. Means  $\pm$  SE,  $n = 4$  biological replicates, each consisting of at least 6 pooled rootstocks. **F**, Distance between the youngest, most proximal LRP and the root tip,  $n=10$ . **G**, Average lateral root length, and **(H)** total lateral root length as a function of scion projected area, measured 18 DAG. **D to G**, Statistical significance was determined by two tails Student’s T-test (\*  $P < 0.05$ ; \*\*  $P < 0.01$ ; \*\*\*  $P < 0.001$ ,  $n=14-18$ ). **A-B**, and **G-H**, Each data point represents an individual plant.

FIGURE 6

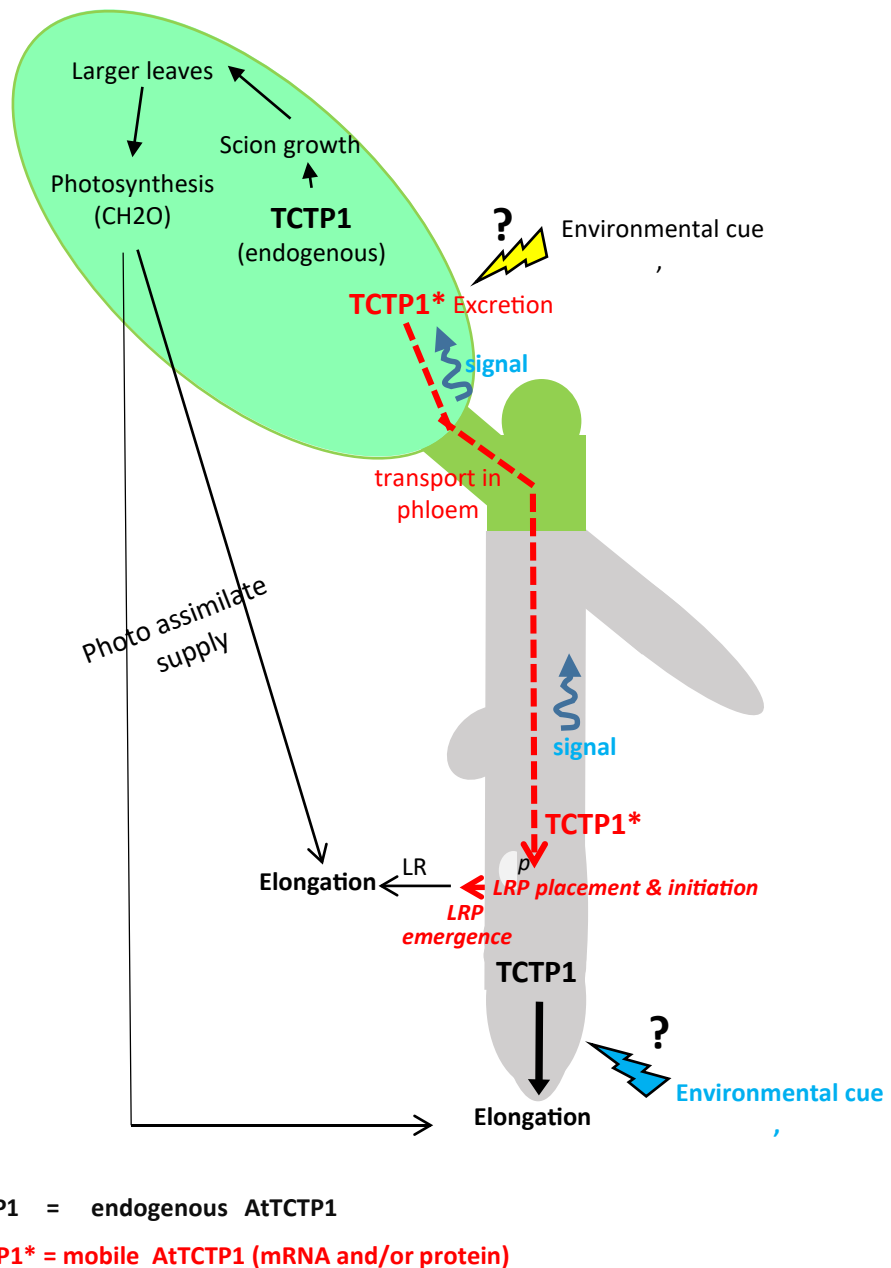

**Fig. 6. Proposed model of synergistic regulation of root development by constitutive and mobile *AtTCTP1* gene products**

Local constitutive *AtTCTP1* (black lettering and arrows) acts as a positive regulator of cell growth and proliferation within roots and aerial organs and thus overall organ size. Overall root length is bounded by photo assimilate supply, hence indirectly dependent on *AtTCTP1* constitutive expression in the shoot through its effects on the size of the photosynthetic apparatus. Mobile *AtTCTP1* messengers translocated from the shoot and encoded proteins (red lettering and arrows) act as systemic destination-selective signalling molecules to dynamically modulate the spatio-temporal patterning of lateral root initiation and emergence sites on the primary root, and the size of the LR formation zone, perhaps too the initial “priming” step of pericycle *LRP* founder cells. The mechanisms flagging *AtTCTP1* gene product(s) for excretion and export to roots, and unloading in destination cells are unknown, but likely regulated by a combination of above-ground and below-ground environmental cues in interaction with endogenous cues, including age-dependent. Dashed arrows depict “movement”; full arrows denote “promotion”. *p* denotes the pericycle.
